# Supplementary material for: Mild-to-Moderate Kidney Dysfunction and Cardiovascular Disease: Observational and Mendelian Randomization Analyses
Source: PubMed Central journal article supplement (PMC9662821; doi:10.1161/circulationaha.122.060700), 2022-10-31
Supplement: cir-146-1507-s002.pdf [file cir-146-1507-s002.pdf]

**Mild-to-moderate kidney dysfunction and cardiovascular disease:  
observational and Mendelian randomization analyses**

**Running Title:** Gaziano et al.; *Kidney dysfunction and CVDs*

**Supplementary Materials**

| <u>Contents</u>                | <u>Page</u> |
|--------------------------------|-------------|
| Expanded Methods               | 2           |
| Supplementary Tables           | 7           |
| Supplementary Figures          | 17          |
| Supplementary Acknowledgements | 34          |

## EXPANDED METHODS

### I. Description of contributing studies or consortium

#### *Emerging Risk Factor Collaboration*

Emerging Risk Factor Collaboration (ERFC) is a consortium of 112 prospective studies, involving a total of 1.2 million participants, that provided individual-level data.<sup>21</sup> These studies were approximately population-based (i.e., did not select participants on the basis of having previous cardiovascular disease); recorded cause-specific mortality or vascular morbidity using accepted criteria; and had accrued more than 1 year of follow-up. Coronary heart disease (CHD) and stroke were defined in each contributing study. Sixty-two studies used standard definitions of myocardial infarction (MI) based on World Health Organization criteria. Fifty-six studies reported diagnosis of strokes on the basis of typical clinical features and characteristic changes on brain imaging, and all attempted to provide attribution of stroke pathological types. In registering fatal outcomes, all contributing studies used coding from the *International Classification of Diseases* (ICD) to at least 3 digits and ascertainment was based on death certificates. Data on serum creatinine measurements were available in 48 studies, and were harmonized at the ERFC coordinating centers in consensus with the individual study collaborators. Genetic information was not available for the current analysis on any of the contributing studies, and therefore ERFC was not included in the Mendelian randomization (MR) analysis.

#### *Million Veteran Program*

Million Veteran Program (MVP) is a prospective biobank with ongoing recruitment from 63 Veterans Health Administration (VA) medical facilities that started in 2011.<sup>23</sup> Participant questionnaires and linkage to Electronic Health Records (EHR) from the VA healthcare system, national death index (NDI), and Centers for Medicare and Medicaid Services (CMS) were used to define baseline exposures and case status.<sup>47-49</sup> CHD was defined as ICD-9 410-414, or ICD-10 I20-I25 and stroke was defined as ICD-9 430-431 or 433-434, or ICD-10 I60-I61 or I63, I69. Creatinine was extracted from EHR as the value closest but prior to enrolment up to a year. Anyone with CHD or stroke codes prior to enrolment were excluded, along with amputees and individuals on HIV medications.<sup>23</sup> Genotyping was performed using an array similar to the UK Biobank Affymetrix Axiom array but with modifications tailored to the veteran population.<sup>47</sup> Genotypes were imputed with Minimac3,<sup>48</sup> using the 1000 Genomes Project reference panel (phase 3, version 5),<sup>49</sup> after phasing by EAGLE v2 software.<sup>50</sup> Ancestry was determined with HARE (harmonized ancestry and race/ethnicity) software, which allocates individuals into ancestry groups from a combination of self-identified race/ethnicity and genetic information.<sup>51</sup> The VA central institutional review board and site-specific Research and Development committees approved the Million Veteran Program study.

### *UK Biobank*

Details of the design, methods, and participants of UK Biobank (UKB) have been described previously.<sup>52</sup> Briefly, participants aged 40 to 75 years identified through primary care lists were recruited across 22 assessment centers throughout the UK between 2006 and 2010. At recruitment, information was collected via a standardized questionnaire and selected physical measurements. Data were subsequently linked to Hospital Episode Statistics (HES), as well as national death and cancer registries. HES uses ICD-9th and 10th Revisions to record diagnosis information, and *Office of Population, Censuses and Surveys: Classification of Interventions and Procedures*, version 4 (OPCS-4) to code operative procedures. Death registries include deaths in the UK, with both primary and contributory causes of death coded in ICD-10. CHD was defined as ICD-10 I20-I25 and stroke was defined as ICD-10 I60-I61 or I63, I64, I69. Genotyping was undertaken using a custom-built genome-wide array of ~826,000 markers.<sup>24</sup> Imputation to ~96 million markers was subsequently carried out using the Haplotype Reference Consortium and UK10K/1000Genomes reference panels.<sup>24</sup> Clinical biochemistry markers, including blood creatinine, total cholesterol, HDL-cholesterol, urinary albumin, and urinary creatinine, were measured in bio-samples collected at baseline. Full details of the biochemistry sampling, handling and quality control protocol, and assay method has been described previously.<sup>53</sup>

### *EPIC-CVD*

EPIC-CVD is a case-cohort embedded in the European Prospective Investigation into Cancer and Nutrition (EPIC), to advance understanding about the separate and combined influence of lifestyle, biochemical, and genetic factors in the development of cardiovascular disease.<sup>54</sup> Briefly, between 1992 and 2000, 519,978 participants were recruited to the EPIC prospective study across 23 centers in ten European countries, via population-based registers, blood donors, screening clinics. CHD and stroke cases were ascertained at each recruiting center through death registries, hospital discharge codes, self-reported by questionnaires or through active follow-up by correspondence with relatives for fatal events. Within each of the contributing EPIC centers, information has been collected and centrally harmonized at the EPIC-CVD Coordinating Centre on: i) a random sample of the original center-specific cohort (i.e., the “sub-cohort”), and ii) all incident CHD and stroke cases. Participants were genotyped using either the Illumina 660W-Quad BeadChip at the Wellcome Trust Sanger Institute or the Illumina HumanCoreExome BeadChip at Cambridge Genomic Services. Samples from each array were then imputed separately to the Haplotype Reference Consortium panel,<sup>55</sup> using IMPUTE2 software.<sup>56</sup>

## II. ERFC study acronyms

| Abbreviation | Full Name                                                                                                                     |
|--------------|-------------------------------------------------------------------------------------------------------------------------------|
| ARIC         | Atherosclerosis Risk in Communities Study                                                                                     |
| AUSDIAB      | Australian Diabetes, Obesity and Lifestyle study'                                                                             |
| BRHS         | British Regional Heart Study                                                                                                  |
| BRUN         | Bruneck Study                                                                                                                 |
| BWHHS        | British Women's Heart and Health Study                                                                                        |
| CASTEL       | Cardiovascular Study in the Elderly                                                                                           |
| CHS1         | Cardiovascular Health Study - 1                                                                                               |
| CHS2         | Cardiovascular Health Study - 2                                                                                               |
| COPEN        | Copenhagen City Heart Study                                                                                                   |
| DRECE        | Diet and Risk of Cardiovascular Disease in Spain                                                                              |
| EPESEBOS     | Established Populations for the Epidemiologic Study of the Elderly Studies, East Boston                                       |
| EPESEIOW     | Established Populations for the Epidemiologic Study of the Elderly Studies, Iowa                                              |
| EPESENC      | Established Populations for the Epidemiologic Study of the Elderly Studies, North Carolina                                    |
| EPESENH      | Established Populations for the Epidemiologic Study of the Elderly Studies, New Haven                                         |
| ESTHER       | Epidemiologische Studie zu Chancen der Verhütung und optimierten Therapie chronischer Erkrankungen in der älteren Bevölkerung |
| GOH          | The Glucose Intolerance, Obesity and Hypertension Study                                                                       |
| GOTO13       | Goteborg Study 1913                                                                                                           |
| GOTO43       | Goteborg Study 1943                                                                                                           |
| GOTOW        | Population Study of Women in Göteborg, Sweden                                                                                 |
| GRIPS        | Göttingen Risk Incidence and Prevalence Study                                                                                 |
| HIMS         | Health in Men Study                                                                                                           |
| HISAYAMA     | Hisayama Study                                                                                                                |
| IKNS         | Ikawa, Kyowa, and Noichi Study                                                                                                |
| KIHD         | Kuopio Ischaemic Heart Disease Study                                                                                          |
| LASA         | Longitudinal Aging Study Amsterdam                                                                                            |
| MATISS83     | Progetto CUORE                                                                                                                |
| MATISS87     | Progetto CUORE                                                                                                                |
| MESA         | Multi-Ethnic Study of Atherosclerosis                                                                                         |
| MONICA_KORA3 | MONICA/KORA Augsburg Survey S3                                                                                                |
| MOSWEGOT     | MONICA Göteborg Study                                                                                                         |
| MPP          | Malmö Preventive Project                                                                                                      |
| MRCOLD       | MRC Study of Older People                                                                                                     |
| NHANESI      | National Health and Nutrition Examination Survey I                                                                            |
| NHANESIII    | National Health and Nutrition Examination Survey III                                                                          |
| NPHSII       | Northwick Park Heart Study II                                                                                                 |
| NSHS         | Nova Scotia Health Survey                                                                                                     |
| OSAKA        | Osaka Study                                                                                                                   |
| RANCHO       | Rancho Bernardo Study                                                                                                         |
| REYK         | Reykjavik Study                                                                                                               |
| RS_I         | The Rotterdam Study I                                                                                                         |
| SHHEC        | Scottish Heart Health Extended Cohort                                                                                         |
| SHIP         | Study of Health in Pomerani                                                                                                   |
| TARFS        | Turkish Adult Risk Factor Study                                                                                               |
| TOYAMA       | Toyama Study                                                                                                                  |
| ULSAM        | Uppsala Longitudinal Study of Adult Men                                                                                       |
| WCWC         | Wuerttemberg Construction Workers Cohort                                                                                      |
| ZUTE         | Zutphen Elderly Study                                                                                                         |

### III. Estimators of glomerular filtration rates

We used eGFR from serum creatinine predicted from CKD-EPI formula in the primary analyses, and where available, we compared results with eGFR estimated using other formulae.

Estimating equations using serum creatinine in mg/dL (to convert serum creatinine in mmol/L to mg/dL, divide by 88.4):

1. Chronic Kidney Disease Epidemiology Collaboration (CKD-EPI)<sup>57</sup>:

$$\text{eGFR} = 141 \times \left\{ \min \left( \frac{\text{creatinine}}{k}, 1 \right) \right\}^{\alpha} \times \left\{ \max \left( \frac{\text{creatinine}}{k}, 1 \right) \right\}^{-1.209} \times 0.993^{\text{age}} \times [1.018 \text{ if female}] \\ \times [1.159 \text{ if black}]$$

where  $k = 0.7$  and  $\alpha = -0.329$  for females, and  $k = 0.9$  and  $\alpha = -0.411$  for males.

Estimating equations using serum cystatin C in mg/L<sup>27</sup>:

1. CKD-EPI

$$\text{eGFR} = 130 \times \left( \frac{\text{cystatin C}}{0.8} \right)^{\alpha} \times 0.996^{\text{age}} \times [0.932 \text{ if female}]$$

where  $\alpha = -0.499$  if cystatin C  $\leq 0.8$ , and  $\alpha = -1.328$  otherwise.

Estimating equations using serum creatinine and serum cystatin C:

1. CKD-EPI

$$\text{eGFR} = 135 \times \left\{ \min \left( \frac{\text{creatinine}}{k}, 1 \right) \right\}^{\alpha} \times \left\{ \max \left( \frac{\text{creatinine}}{k}, 1 \right) \right\}^{-0.601} \times \left( \frac{\text{cystatin C}}{0.8} \right)^{\beta} \times 0.995^{\text{age}} \\ \times [0.969 \text{ if female}] \times [1.08 \text{ if black}]$$

where  $k = 0.7$  and  $\alpha = -0.248$  for females, and  $k = 0.9$  and  $\alpha = -0.207$  for males, and  $\beta = -0.375$  if cystatin C  $\leq 0.8$ , and  $\beta = -0.711$  otherwise

#### IV. Non-linear Mendelian randomization analysis

Mendelian randomization (MR) methods typically assume that the exposure-outcome relationship is linear when estimating a causal association. However, large-scale prospective epidemiological studies among different populations, and the present study performed among participants without prior history of cardiovascular disease or diabetes, have demonstrated that there is a reversed J-shaped association between creatinine-based eGFR and risk of CHD and stroke. To account for the non-linear relationship when investigating the causal relevance of kidney function for risk of CHD, and stroke, we applied a tailored novel method, i.e., the non-linear MR approach.<sup>16-17,58</sup>

##### *Genetically-predicted eGFR and cardiovascular outcomes*

Within each study (i.e., EPIC-CVD, MVP, and UKB), we calculated the residual variation in creatinine-based eGFR (henceforth, termed as *IV-free* eGFR) by subtracting the genetically-determined eGFR from the creatinine-based eGFR. The IV-free eGFR can be interpreted as the expected value of a participant's eGFR if their GRS was 0. Based on the IV-free eGFR, all study participants were then stratified into 5-unit groups between 45-105 mL/min/1.73 m<sup>2</sup>, plus <45 and ≥105 mL/min/1.73 m<sup>2</sup>. Within stratum, linear MR estimates were calculated using the ratio method. These stratum-specific MR estimates are localized average causal effect (LACE) estimates and were pooled across studies using fixed-effects meta-analysis within each stratum. The stratum-specific MR estimates were plotted as a piecewise-linear function of eGFR, where the slope in each piece is the LACE estimate in that stratum. The estimated risk was plotted against the mean eGFR in each stratum, relative to the risk at 90 mL/min/1.73 m<sup>2</sup>. Point-wise confidence intervals were calculated by re-sampling the MR estimates and re-calculating the full piecewise-linear shape. Interpretation of graphical representations of these non-linear genetic associations must focus on the slope in the neighborhood of an eGFR value of interest, rather than comparisons of absolute risk made across the range of the eGFR distribution.

##### *Genetically-predicted eGFR and other vascular risk factors*

To assess the specificity of the GRSs for eGFR, we tested associations of GRSs with a range of vascular risk factors (e.g., systolic blood pressure, LDL-cholesterol, and diabetes status) in UKB and EPIC-CVD studies, and with 167 metabolites measured using targeted high-throughput NMR metabolomics (Nightingale Health Ltd) in UKB. The analyses were conducted among participants with no prior history of vascular diseases or diabetes, and not on lipid-lowering treatments. NMR-measured metabolites were standardized for comparison via rank-based inverse normal transformation. Linear regression was used to relate GRSs to continuous traits, and logistic regression was used for binary outcomes, adjusted for age, age-squared, sex, study center, and the first ten principal components.

### *Sensitivity analyses using doubly-ranked method*

An assumption made in the primary non-linear Mendelian randomization method described above (hereafter referred to as the “residual method”) is that the effect of the genetic instrument on the exposure is constant across the distribution of the exposure. That is, the magnitude of the genetic effect on eGFR is the same for individuals with different values of eGFR. A recently-developed method for non-linear Mendelian randomization, the “doubly-ranked method”, is able to relax this assumption<sup>59</sup>. However, the doubly-ranked method has some practical limitations in the context of this investigation. In particular, strata created by the residual method can be defined with respect to clinically-relevant eGFR values, whereas strata created by the doubly-ranked method cannot. This means that estimates from the doubly-ranked method cannot easily be combined across datasets. However, estimates from the residual method are subject to potential bias when the constant genetic effect assumption is violated, although the extent of bias is unclear. We implemented both the doubly-ranked and residual methods to assess the robustness of findings to this assumption. For both methods, we divided the population into deciles and calculated Mendelian randomization estimates in each decile for the outcome of CHD.

Results are displayed in Table S6a and Figure S13a. We observe evidence that the constant genetic effect assumption is violated, although the violation is stronger at the top end of the eGFR distribution compared with the bottom end. The estimates from the residual method indicate that there is evidence for a causal effect of eGFR on CHD risk from the doubly-ranked method in the lowest three deciles for MVP, and some evidence in the lowest decile for UK Biobank. In both cases, these are the only decile groups with a mean eGFR below 75 mL/min/1.73 m<sup>2</sup>. There is also some evidence for a causal effect of eGFR in the highest decile groups for both methods. Overall, results are similar from the residual and doubly-ranked methods, suggesting that bias due to violation of the constant genetic effect assumption is not substantial in this case.

**Table S1: Definitions of coronary heart diseases and stroke**

| <b>Outcome (includes both fatal and non-fatal)</b> | <b>ICD-10 codes</b>   |
|----------------------------------------------------|-----------------------|
| <b>All cardiovascular</b>                          | I20-I25, I60-I64, I69 |
| <b>Coronary heart disease</b>                      | I20-I25               |
| <b>All stroke</b>                                  | I60-I64, I69          |
| Ischemic stroke                                    | I63, I69.3            |
| Intracerebral hemorrhage                           | I61, I69.1            |
| Subarachnoid hemorrhage                            | I60, I69.0            |
| Unclassified stroke <sup>†</sup>                   | I64, I69.4            |

<sup>†</sup> Unclassified stroke refers to ICD codes I64 (ICD-10), 436 (ICD-9) or earlier ICD equivalents, or strokes not specified as ischemic or hemorrhagic stroke in study specific codes. Corresponding ICD-6, 7 or 8 codes are used for ERFC studies that recorded outcomes using earlier ICD versions.



**Table S2: Number of participants by eGFR category and contributing study**

| Cohort       | Total   | creatinine-based eGFR categories, mL/min/1.73 m <sup>2</sup> |        |        |         |         |          |       |
|--------------|---------|--------------------------------------------------------------|--------|--------|---------|---------|----------|-------|
|              |         | <45                                                          | 45-<60 | 60-<75 | 75-<90  | 90-<105 | 105-<120 | >120  |
| ARIC         | 11,421  | 64                                                           | 1,271  | 5,134  | 3,719   | 1,054   | 164      | 15    |
| AUSDIAB      | 8,307   | 35                                                           | 338    | 1,807  | 3,502   | 2,176   | 447      | 2     |
| BRHS         | 6,406   | 15                                                           | 180    | 1,529  | 2,785   | 1,646   | 249      | 2     |
| BRUN         | 756     | 4                                                            | 20     | 98     | 265     | 297     | 72       | -     |
| BWHHS        | 2,503   | 17                                                           | 306    | 1,137  | 885     | 157     | 1        | -     |
| CASTEL       | 1,793   | 54                                                           | 224    | 464    | 746     | 292     | 10       | 3     |
| CHS1         | 2,936   | 127                                                          | 613    | 1,048  | 896     | 246     | 6        | -     |
| CHS2         | 312     | 9                                                            | 28     | 91     | 89      | 75      | 19       | 1     |
| COPEN        | 6,569   | 94                                                           | 819    | 2,277  | 2,192   | 1,004   | 179      | 4     |
| DRECE        | 2,058   | 4                                                            | 27     | 312    | 762     | 663     | 265      | 25    |
| EPESEBOS     | 437     | 55                                                           | 179    | 138    | 61      | 4       | -        | -     |
| EPESEIOW     | 708     | 112                                                          | 304    | 193    | 94      | 5       | -        | -     |
| EPESENC      | 609     | 105                                                          | 260    | 197    | 42      | 5       | -        | -     |
| EPESESHA     | 341     | 46                                                           | 134    | 108    | 43      | 8       | 2        | -     |
| ESTHER       | 3,995   | 134                                                          | 372    | 646    | 984     | 1,425   | 349      | 85    |
| GOH          | 867     | 12                                                           | 42     | 200    | 248     | 257     | 106      | 2     |
| GOTO43       | 723     | -                                                            | 1      | 56     | 303     | 350     | 12       | 1     |
| GRIPS        | 5,645   | 14                                                           | 184    | 1,160  | 2,720   | 1,266   | 297      | 4     |
| HIMS         | 1,823   | 47                                                           | 152    | 480    | 984     | 158     | 2        | -     |
| HISAYAMA     | 2,236   | 12                                                           | 173    | 825    | 858     | 334     | 34       | -     |
| IKNS         | 4,204   | 12                                                           | 68     | 415    | 1,139   | 1,847   | 708      | 15    |
| KIHD         | 1,792   | 5                                                            | 13     | 209    | 627     | 796     | 137      | 5     |
| LASA         | 124     | 3                                                            | 26     | 66     | 27      | 2       | -        | -     |
| MATISS83     | 2,403   | 10                                                           | 70     | 297    | 576     | 899     | 479      | 72    |
| MATISS87     | 1,876   | 17                                                           | 46     | 268    | 500     | 669     | 341      | 35    |
| MESA         | 5,696   | 56                                                           | 319    | 1,204  | 2,021   | 1,672   | 381      | 43    |
| MONICA_KORA3 | 3,902   | 16                                                           | 39     | 154    | 457     | 1,387   | 1,441    | 408   |
| MOSWEGOT     | 309     | 5                                                            | 93     | 137    | 63      | 11      | -        | -     |
| NHANESIII    | 8,946   | 156                                                          | 853    | 2,322  | 3,079   | 1,896   | 544      | 96    |
| NSHS         | 913     | 6                                                            | 16     | 75     | 168     | 374     | 230      | 44    |
| OSAKA        | 3,476   | 9                                                            | 39     | 477    | 1,296   | 1,244   | 394      | 17    |
| RANCHO       | 1,406   | 71                                                           | 424    | 546    | 286     | 76      | 3        | -     |
| REYK         | 11,808  | 38                                                           | 388    | 2,640  | 4,650   | 3,551   | 529      | 12    |
| RS_I         | 3,371   | 18                                                           | 213    | 915    | 1,434   | 777     | 13       | 1     |
| SHHEC        | 9,643   | 23                                                           | 282    | 2,402  | 4,270   | 2,276   | 383      | 7     |
| SHIP         | 1,743   | 4                                                            | 42     | 287    | 639     | 575     | 192      | 4     |
| TARFS        | 561     | 6                                                            | 17     | 80     | 131     | 207     | 109      | 11    |
| TOYAMA       | 4,303   | 7                                                            | 10     | 103    | 695     | 2,040   | 1,405    | 43    |
| ULSAM        | 1,728   | 2                                                            | 2      | 70     | 186     | 959     | 495      | 14    |
| WCWC         | 551     | -                                                            | -      | 11     | 111     | 277     | 148      | 4     |
| ZUTE         | 401     | 9                                                            | 85     | 173    | 121     | 13      | -        | -     |
| MVP          | 147,356 | 2,698                                                        | 9,457  | 29,552 | 46,200  | 41,461  | 15,176   | 2,812 |
| EPICCV       | 20,985  | 139                                                          | 503    | 2,306  | 5,524   | 9,400   | 2,942    | 171   |
| UKBIOBANK    | 350,193 | 809                                                          | 5,232  | 33,895 | 100,351 | 165,603 | 43,124   | 1,179 |

Data are number of participants.

**Table S3: Characteristics of participants by categories of eGFR**

|                           | Categories of eGFR (mL/min/1.73 m <sup>2</sup> ) |            |            |            |            |            |            |            |            |
|---------------------------|--------------------------------------------------|------------|------------|------------|------------|------------|------------|------------|------------|
|                           | <15                                              | 15-<30     | 30-<45     | 45-<60     | 60-<75     | 75-<90     | 90-<105    | 105-<120   | >120       |
| Age                       | 60.2 (4.7)                                       | 65.4 (4.4) | 66.7 (3.6) | 65.6 (3.7) | 62.2 (4.1) | 59.2 (4.5) | 55.7 (4.3) | 47 (3.5)   | 41.6 (3.2) |
| Sex                       |                                                  |            |            |            |            |            |            |            |            |
| Men                       | 271                                              | 609        | 2,552      | 13,919     | 55,794     | 114,660    | 133,631    | 37,506     | 2,899      |
| Women                     | 58                                               | 193        | 1,395      | 9,945      | 40,710     | 82,069     | 115,804    | 33,882     | 2,238      |
| Creatinine                | 7.1 (1.7)                                        | 2.6 (0.3)  | 1.7 (0.1)  | 1.3 (0.1)  | 1.1 (0.1)  | 0.9 (0.1)  | 0.8 (0.1)  | 0.8 (0.1)  | 0.6 (0.1)  |
| Incident CHD events       | 90                                               | 142        | 523        | 2,693      | 8,303      | 13,614     | 14,619     | 2,706      | 168        |
| Incident stroke events    | 8                                                | 34         | 214        | 1,087      | 3,186      | 4,793      | 5,298      | 1,002      | 71         |
| BMI, kg/m <sup>2</sup>    | 26.4 (2.4)                                       | 27.4 (2.7) | 27.7 (2.5) | 27.8 (2.4) | 27.8 (2.3) | 27.5 (2.4) | 27.3 (2.5) | 27.3 (2.7) | 27.1 (3)   |
| SBP, mmHg                 | 137 (11)                                         | 138 (10)   | 137 (10)   | 135 (9)    | 134 (9)    | 132 (8)    | 131 (8)    | 127 (8)    | 126 (8)    |
| Smoking status            |                                                  |            |            |            |            |            |            |            |            |
| Not current               | 303                                              | 730        | 3,567      | 21,245     | 84,160     | 169,933    | 212,106    | 56,731     | 3,939      |
| Current                   | 26                                               | 72         | 380        | 2,619      | 12,344     | 26,796     | 37,329     | 14,657     | 1,198      |
| HDL cholesterol, mmol/L   | 1.2 (0.2)                                        | 1.2 (0.2)  | 1.3 (0.2)  | 1.3 (0.2)  | 1.3 (0.2)  | 1.3 (0.2)  | 1.3 (0.2)  | 1.3 (0.2)  | 1.4 (0.2)  |
| Total cholesterol, mmol/L | 5.0 (0.5)                                        | 5.0 (0.6)  | 5.2 (0.6)  | 5.3 (0.5)  | 5.3 (0.5)  | 5.3 (0.5)  | 5.3 (0.5)  | 5.1 (0.5)  | 5.0 (0.5)  |

Data are n, or mean (SD). Participants with missing information on age, sex systolic blood pressure, total and high-density lipoprotein cholesterol, body-mass index, and smoking status were excluded. CHD= coronary heart disease. BMI= body-mass index. SBP= systolic blood pressure. HDL= high-density lipoprotein. eGFR= estimated glomerula filtration rate

**Table S4: Variants used to make the genetic risk score for eGFR (using creatinine in the CKD-EPI equation).**

| RSID        | Chromosome and base pair | Effect allele | Other allele | European ancestry  |        | Trans-ancestry     |        |
|-------------|--------------------------|---------------|--------------|--------------------|--------|--------------------|--------|
|             |                          |               |              | Effect size (beta) | SE     | Effect size (beta) | SE     |
| rs11166440  | 1:100808363              | A             | G            | 0.0021             | 0.0004 | 0.002              | 0.0003 |
| rs74748843  | 1:10730910               | C             | T            | 0.006              | 0.0013 | 0.0048             | 0.0008 |
| rs12736457  | 1:113258293              | C             | G            | 0.0056             | 0.0005 | 0.0054             | 0.0005 |
| rs3118119   | 1:150159616              | T             | C            | 0.0031             | 0.0005 | 0.003              | 0.0005 |
| rs267738    | 1:150940625              | G             | T            | 0.005              | 0.0004 | 0.0048             | 0.0004 |
| rs10159261  | 1:15912987               | G             | T            | 0.0038             | 0.0004 | 0.0034             | 0.0003 |
| rs3845534   | 1:163738950              | G             | A            | 0.0019             | 0.0003 | 0.0019             | 0.0003 |
| rs4656220   | 1:170649277              | T             | C            | 0.0021             | 0.0004 | 0.002              | 0.0003 |
| rs1011731   | 1:172346548              | G             | A            | 0.0019             | 0.0003 | 0.0019             | 0.0003 |
| rs3795503   | 1:180905694              | T             | C            | 0.0022             | 0.0004 | 0.002              | 0.0003 |
| rs78444298  | 1:184672098              | G             | A            | 0.0107             | 0.0014 | 0.0105             | 0.0014 |
| rs78329830  | 1:186769572              | G             | A            | 0.0051             | 0.001  | 0.0054             | 0.0009 |
| rs12061708  | 1:18809916               | G             | A            | 0.0027             | 0.0004 | 0.0026             | 0.0003 |
| rs3850625   | 1:201016296              | A             | G            | 0.0048             | 0.0006 | 0.0046             | 0.0005 |
| rs2808454   | 1:207231751              | A             | T            | 0.0019             | 0.0003 | 0.0019             | 0.0003 |
| rs75625374  | 1:208039431              | C             | G            | 0.0043             | 0.0007 | 0.0045             | 0.0007 |
| rs7535253   | 1:214744893              | T             | C            | 0.0023             | 0.0004 | 0.0021             | 0.0004 |
| rs2577134   | 1:220224321              | T             | C            | 0.0021             | 0.0004 | 0.002              | 0.0003 |
| rs61830291  | 1:221001142              | C             | A            | 0.0036             | 0.0006 | 0.0036             | 0.0006 |
| rs417237    | 1:228532195              | T             | G            | 0.002              | 0.0004 | 0.0018             | 0.0003 |
| rs2749153   | 1:23699340               | G             | A            | 0.003              | 0.0004 | 0.0033             | 0.0003 |
| rs2490391   | 1:243469669              | C             | A            | 0.0025             | 0.0003 | 0.0024             | 0.0003 |
| rs688540    | 1:48002447               | G             | A            | 0.0031             | 0.0006 | 0.003              | 0.0005 |
| rs17413465  | 1:55718708               | A             | C            | 0.0025             | 0.0004 | 0.0025             | 0.0004 |
| rs1757915   | 1:56615809               | A             | G            | 0.002              | 0.0004 | 0.0021             | 0.0003 |
| rs7536433   | 1:78023173               | T             | C            | 0.0018             | 0.0004 | 0.0021             | 0.0004 |
| rs679843    | 1:78707493               | T             | C            | 0.002              | 0.0004 | 0.0021             | 0.0003 |
| rs17050272  | 2:121306440              | G             | A            | 0.0022             | 0.0004 | 0.0022             | 0.0003 |
| rs11694902  | 2:121988884              | A             | G            | 0.0041             | 0.0005 | 0.0041             | 0.0005 |
| rs7425436   | 2:148759656              | A             | G            | 0.0026             | 0.0004 | 0.0024             | 0.0003 |
| rs4664475   | 2:152387553              | C             | T            | 0.002              | 0.0004 | 0.002              | 0.0003 |
| rs807624    | 2:15782471               | T             | G            | 0.0034             | 0.0004 | 0.0032             | 0.0003 |
| rs35472707  | 2:169995581              | C             | T            | 0.0075             | 0.0008 | 0.0073             | 0.0008 |
| rs187355703 | 2:176993583              | C             | G            | 0.0101             | 0.0011 | 0.01               | 0.0011 |
| rs35284526  | 2:178121524              | A             | C            | 0.0029             | 0.0004 | 0.0029             | 0.0003 |
| rs4666821   | 2:183077254              | T             | G            | 0.0018             | 0.0003 | 0.002              | 0.0003 |
| rs4491726   | 2:18676276               | A             | G            | 0.0032             | 0.0004 | 0.0032             | 0.0004 |
| rs60980181  | 2:188168567              | T             | A            | 0.0029             | 0.0005 | 0.0027             | 0.0004 |
| rs1047891   | 2:211540507              | C             | A            | 0.0065             | 0.0004 | 0.0065             | 0.0004 |
| rs1548945   | 2:217665788              | T             | C            | 0.0037             | 0.0004 | 0.0036             | 0.0003 |
| rs1050816   | 2:220358198              | T             | C            | 0.0029             | 0.0004 | 0.0026             | 0.0003 |
| rs35669853  | 2:227287718              | A             | G            | 0.0026             | 0.0004 | 0.0024             | 0.0004 |
| rs13003198  | 2:234257105              | T             | C            | 0.0017             | 0.0004 | 0.0018             | 0.0003 |
| rs2301343   | 2:40680149               | G             | T            | 0.0023             | 0.0004 | 0.0023             | 0.0004 |
| rs10865189  | 2:43433257               | C             | G            | 0.0025             | 0.0004 | 0.0024             | 0.0003 |
| rs2971880   | 2:54885640               | T             | A            | 0.0026             | 0.0004 | 0.0024             | 0.0003 |
| rs10197255  | 2:67874553               | A             | T            | 0.0018             | 0.0004 | 0.0018             | 0.0003 |
| rs6546869   | 2:73895765               | A             | G            | 0.0061             | 0.0004 | 0.0059             | 0.0004 |

| RSID        | Chromosome and base pair | Effect allele | Other allele | European ancestry  |        | Trans-ancestry     |        |
|-------------|--------------------------|---------------|--------------|--------------------|--------|--------------------|--------|
|             |                          |               |              | Effect size (beta) | SE     | Effect size (beta) | SE     |
| rs2289746   | 3:105455955              | C             | T            | 0.0016             | 0.0004 | 0.0019             | 0.0003 |
| rs9868185   | 3:121657593              | A             | G            | 0.0027             | 0.0003 | 0.0026             | 0.0003 |
| rs10934754  | 3:125906237              | T             | C            | 0.0017             | 0.0003 | 0.002              | 0.0003 |
| rs35320690  | 3:135932494              | C             | T            | 0.0025             | 0.0004 | 0.0025             | 0.0004 |
| rs9828976   | 3:136536835              | G             | C            | 0.0024             | 0.0004 | 0.0024             | 0.0004 |
| rs7624084   | 3:141093285              | T             | C            | 0.0015             | 0.0003 | 0.0017             | 0.0003 |
| rs1397764   | 3:141750810              | A             | G            | 0.0047             | 0.0004 | 0.0043             | 0.0003 |
| rs76272256  | 3:168888112              | T             | C            | 0.0024             | 0.0005 | 0.0024             | 0.0004 |
| rs56065557  | 3:185354216              | G             | C            | 0.003              | 0.0004 | 0.0029             | 0.0003 |
| rs9823161   | 3:193811168              | A             | G            | 0.0021             | 0.0004 | 0.0022             | 0.0004 |
| rs6779998   | 3:30749965               | G             | A            | 0.0019             | 0.0003 | 0.0017             | 0.0003 |
| rs3774726   | 3:63974477               | C             | T            | 0.0023             | 0.0004 | 0.0021             | 0.0003 |
| rs3775932   | 4:10090930               | C             | A            | 0.002              | 0.0003 | 0.0018             | 0.0003 |
| rs223471    | 4:103698786              | C             | G            | 0.0028             | 0.0004 | 0.0028             | 0.0003 |
| rs55929207  | 4:109703549              | C             | G            | 0.002              | 0.0003 | 0.0019             | 0.0003 |
| rs16874073  | 4:23743962               | C             | T            | 0.0041             | 0.0008 | 0.0045             | 0.0007 |
| rs75501914  | 4:3449781                | A             | G            | 0.0042             | 0.0008 | 0.0039             | 0.0006 |
| rs4864890   | 4:52686513               | C             | T            | 0.0023             | 0.0004 | 0.0023             | 0.0004 |
| rs12509595  | 4:81182554               | C             | T            | 0.0032             | 0.0004 | 0.0035             | 0.0003 |
| rs12777     | 5:131671662              | C             | G            | 0.005              | 0.0009 | 0.005              | 0.0009 |
| rs11743174  | 5:148524820              | T             | C            | 0.0019             | 0.0004 | 0.0019             | 0.0003 |
| rs3812036   | 5:176813404              | C             | T            | 0.0069             | 0.0004 | 0.0065             | 0.0004 |
| rs13157326  | 5:34504277               | G             | A            | 0.0027             | 0.0004 | 0.0027             | 0.0003 |
| rs495237    | 5:39950266               | T             | G            | 0.0029             | 0.0004 | 0.0027             | 0.0003 |
| rs11746506  | 5:44812566               | T             | C            | 0.0018             | 0.0004 | 0.0017             | 0.0003 |
| rs79760705  | 5:53298716               | T             | G            | 0.0056             | 0.0006 | 0.0056             | 0.0005 |
| rs72759880  | 5:67750213               | G             | T            | 0.0057             | 0.0005 | 0.0056             | 0.0005 |
| rs2010352   | 5:68656327               | G             | A            | 0.0019             | 0.0003 | 0.0018             | 0.0003 |
| rs3797537   | 5:78322650               | A             | G            | 0.0021             | 0.0004 | 0.0019             | 0.0003 |
| rs1857859   | 6:100894587              | A             | G            | 0.0014             | 0.0004 | 0.0019             | 0.0003 |
| rs1268168   | 6:109008158              | A             | G            | 0.0027             | 0.0004 | 0.0024             | 0.0003 |
| rs7740107   | 6:130374461              | A             | T            | 0.0027             | 0.0004 | 0.0027             | 0.0004 |
| rs9375818   | 6:131882078              | G             | A            | 0.0026             | 0.0004 | 0.0031             | 0.0004 |
| rs3822939   | 6:133849789              | G             | A            | 0.0028             | 0.0003 | 0.0025             | 0.0003 |
| rs9397738   | 6:154986664              | A             | G            | 0.0025             | 0.0005 | 0.0027             | 0.0004 |
| rs12207180  | 6:160633107              | T             | A            | 0.0085             | 0.0005 | 0.0085             | 0.0005 |
| rs3765502   | 6:24354045               | T             | C            | 0.0017             | 0.0006 | 0.0024             | 0.0004 |
| rs144100226 | 6:34180297               | T             | C            | 0.006              | 0.0011 | 0.0059             | 0.001  |
| rs13200335  | 6:41690823               | A             | C            | 0.0024             | 0.0003 | 0.0024             | 0.0003 |
| rs77915916  | 6:43287722               | A             | T            | 0.0047             | 0.0006 | 0.0046             | 0.0006 |
| rs881858    | 6:43806609               | G             | A            | 0.0056             | 0.0004 | 0.0054             | 0.0003 |
| rs720989    | 6:44765535               | T             | G            | 0.0023             | 0.0004 | 0.0021             | 0.0004 |
| rs6458868   | 6:52630153               | C             | T            | 0.0021             | 0.0004 | 0.002              | 0.0003 |
| rs3925003   | 6:55422618               | C             | T            | 0.0019             | 0.0003 | 0.0018             | 0.0003 |
| rs11755724  | 6:7118990                | A             | G            | 0.0027             | 0.0004 | 0.0027             | 0.0004 |
| rs72912510  | 6:90118764               | G             | A            | 0.002              | 0.0004 | 0.0024             | 0.0004 |
| rs3757387   | 7:128576086              | T             | C            | 0.0029             | 0.0004 | 0.003              | 0.0003 |
| rs62435145  | 7:1286567                | G             | T            | 0.0055             | 0.0004 | 0.006              | 0.0004 |
| rs62491533  | 7:129564134              | C             | T            | 0.0027             | 0.0005 | 0.0027             | 0.0004 |
| rs10254101  | 7:151415536              | C             | T            | 0.0068             | 0.0004 | 0.0068             | 0.0004 |
| rs12671694  | 7:155665959              | T             | C            | 0.0028             | 0.0004 | 0.0025             | 0.0003 |

| RSID        | Chromosome and base pair | Effect allele | Other allele | European ancestry  |        | Trans-ancestry     |        |
|-------------|--------------------------|---------------|--------------|--------------------|--------|--------------------|--------|
|             |                          |               |              | Effect size (beta) | SE     | Effect size (beta) | SE     |
| rs868822    | 7:156252939              | T             | G            | 0.0032             | 0.0004 | 0.0029             | 0.0003 |
| rs6968554   | 7:17287106               | G             | A            | 0.0022             | 0.0004 | 0.0019             | 0.0003 |
| rs3750081   | 7:32930876               | G             | T            | 0.0019             | 0.0004 | 0.0022             | 0.0003 |
| rs55773927  | 7:65337902               | T             | C            | 0.002              | 0.0003 | 0.0019             | 0.0003 |
| rs41301394  | 7:75612803               | T             | C            | 0.002              | 0.0004 | 0.0023             | 0.0003 |
| rs11783418  | 8:10841858               | G             | A            | 0.002              | 0.0004 | 0.002              | 0.0004 |
| rs10098664  | 8:11417493               | C             | T            | 0.0024             | 0.0004 | 0.0021             | 0.0003 |
| rs2954017   | 8:126476873              | T             | C            | 0.0026             | 0.0004 | 0.0024             | 0.0003 |
| rs34861762  | 8:23748420               | C             | T            | 0.0043             | 0.0003 | 0.0043             | 0.0003 |
| rs10102889  | 8:32435620               | G             | C            | 0.005              | 0.0013 | 0.0036             | 0.0006 |
| rs2980423   | 8:8142575                | C             | T            | 0.0025             | 0.0004 | 0.0023             | 0.0003 |
| rs1533059   | 8:8684953                | A             | G            | 0.0028             | 0.0004 | 0.0025             | 0.0003 |
| rs2976178   | 8:87332552               | G             | C            | 0.0027             | 0.0004 | 0.0025             | 0.0003 |
| rs35353426  | 8:9297246                | C             | T            | 0.0026             | 0.0004 | 0.0026             | 0.0004 |
| rs1321917   | 9:119324929              | G             | C            | 0.0025             | 0.0003 | 0.0023             | 0.0003 |
| rs7024579   | 9:139100413              | T             | C            | 0.0023             | 0.0004 | 0.0023             | 0.0004 |
| rs28404308  | 9:140103272              | A             | T            | 0.0027             | 0.0005 | 0.0024             | 0.0004 |
| rs12377027  | 9:20554583               | G             | A            | 0.0027             | 0.0005 | 0.0026             | 0.0005 |
| rs13287724  | 9:33169034               | T             | A            | 0.0029             | 0.0006 | 0.003              | 0.0006 |
| rs544169    | 9:33956791               | A             | G            | 0.0024             | 0.0004 | 0.0022             | 0.0003 |
| rs284859    | 10:104573017             | T             | G            | 0.0027             | 0.0004 | 0.0026             | 0.0004 |
| rs1536225   | 10:105202318             | G             | T            | 0.0019             | 0.0004 | 0.0021             | 0.0003 |
| rs6481598   | 10:29781798              | C             | G            | 0.0023             | 0.0004 | 0.0024             | 0.0004 |
| rs7072591   | 10:35150364              | A             | G            | 0.0019             | 0.0004 | 0.0019             | 0.0003 |
| rs8474      | 10:51026705              | C             | G            | 0.0019             | 0.0003 | 0.002              | 0.0003 |
| rs10821905  | 10:52646093              | A             | G            | 0.0039             | 0.0004 | 0.0037             | 0.0004 |
| rs7475348   | 10:69965177              | T             | C            | 0.0027             | 0.0004 | 0.0031             | 0.0003 |
| rs12240572  | 10:75016365              | T             | A            | 0.0034             | 0.0007 | 0.0032             | 0.0006 |
| rs816850    | 10:79252446              | G             | C            | 0.002              | 0.0004 | 0.002              | 0.0004 |
| rs7095954   | 10:82209232              | T             | A            | 0.0019             | 0.0003 | 0.0018             | 0.0003 |
| rs9420446   | 10:88880689              | T             | C            | 0.0022             | 0.0005 | 0.0023             | 0.0004 |
| rs80282103  | 10:899071                | A             | T            | 0.0081             | 0.0006 | 0.0078             | 0.0006 |
| rs2068888   | 10:94839642              | G             | A            | 0.0026             | 0.0003 | 0.0024             | 0.0003 |
| rs4918943   | 10:97278922              | G             | A            | 0.0023             | 0.0005 | 0.0022             | 0.0004 |
| rs6589750   | 11:119326726             | A             | G            | 0.0017             | 0.0004 | 0.002              | 0.0003 |
| rs10790452  | 11:121584931             | T             | C            | 0.002              | 0.0004 | 0.002              | 0.0003 |
| rs11564722  | 11:2178330               | T             | C            | 0.0038             | 0.0004 | 0.0033             | 0.0004 |
| rs63934     | 11:2789062               | A             | G            | 0.0042             | 0.0004 | 0.0041             | 0.0004 |
| rs963837    | 11:30749090              | C             | T            | 0.0055             | 0.0004 | 0.0057             | 0.0003 |
| rs61897431  | 11:47427667              | T             | C            | 0.0028             | 0.0004 | 0.0029             | 0.0004 |
| rs7127946   | 11:48250675              | T             | C            | 0.0023             | 0.0004 | 0.0023             | 0.0003 |
| rs2727040   | 11:49057603              | C             | T            | 0.0026             | 0.0006 | 0.0026             | 0.0004 |
| rs1813937   | 11:50468801              | T             | C            | 0.0019             | 0.0004 | 0.0022             | 0.0004 |
| rs1541937   | 11:5578558               | C             | A            | 0.0029             | 0.0004 | 0.0029             | 0.0004 |
| rs1783827   | 11:57409538              | G             | A            | 0.0021             | 0.0004 | 0.002              | 0.0003 |
| rs948493    | 11:65552154              | C             | T            | 0.0032             | 0.0004 | 0.0033             | 0.0003 |
| rs11237450  | 11:78023356              | A             | C            | 0.003              | 0.0005 | 0.0032             | 0.0004 |
| rs117113238 | 12:12209203              | A             | G            | 0.0039             | 0.0006 | 0.0039             | 0.0006 |
| rs10846157  | 12:15325031              | C             | A            | 0.0036             | 0.0004 | 0.0034             | 0.0004 |
| rs632887    | 12:3392351               | A             | G            | 0.0033             | 0.0004 | 0.0032             | 0.0003 |
| rs11062167  | 12:364739                | G             | A            | 0.0042             | 0.0003 | 0.0039             | 0.0003 |

| RSID        | Chromosome and base pair | Effect allele | Other allele | European ancestry  |        | Trans-ancestry     |        |
|-------------|--------------------------|---------------|--------------|--------------------|--------|--------------------|--------|
|             |                          |               |              | Effect size (beta) | SE     | Effect size (beta) | SE     |
| rs4238020   | 12:4616642               | T             | C            | 0.0028             | 0.0005 | 0.0029             | 0.0005 |
| rs2634675   | 12:48740855              | A             | G            | 0.0028             | 0.0004 | 0.0025             | 0.0003 |
| rs12313306  | 12:57751854              | T             | C            | 0.0031             | 0.0004 | 0.0029             | 0.0004 |
| rs41284816  | 13:50655989              | G             | T            | 0.0079             | 0.0012 | 0.0078             | 0.0012 |
| rs500830    | 13:72348768              | T             | C            | 0.0026             | 0.0003 | 0.0029             | 0.0003 |
| rs61993680  | 14:100752644             | C             | A            | 0.0022             | 0.0004 | 0.0019             | 0.0003 |
| rs72683923  | 14:50735947              | C             | T            | 0.0076             | 0.0014 | 0.0074             | 0.0013 |
| rs6574652   | 14:81870100              | C             | T            | 0.0019             | 0.0003 | 0.0017             | 0.0003 |
| rs1028455   | 14:88829975              | A             | T            | 0.0021             | 0.0004 | 0.002              | 0.0003 |
| rs17184313  | 14:93102251              | C             | T            | 0.0028             | 0.0005 | 0.0029             | 0.0005 |
| rs12913015  | 15:39305443              | T             | C            | 0.0028             | 0.0004 | 0.0027             | 0.0003 |
| rs6492982   | 15:41399951              | C             | T            | 0.0032             | 0.0004 | 0.0033             | 0.0004 |
| rs1994887   | 15:57793765              | C             | A            | 0.0024             | 0.0004 | 0.002              | 0.0004 |
| rs956006    | 15:62808539              | T             | C            | 0.0022             | 0.0004 | 0.0019             | 0.0003 |
| rs11071738  | 15:63580155              | C             | T            | 0.0025             | 0.0003 | 0.0025             | 0.0003 |
| rs11071939  | 15:67463391              | C             | T            | 0.0038             | 0.0007 | 0.0039             | 0.0006 |
| rs351237    | 15:74477239              | G             | A            | 0.0018             | 0.0004 | 0.0018             | 0.0003 |
| rs2472297   | 15:75027880              | T             | C            | 0.0039             | 0.0004 | 0.0039             | 0.0004 |
| rs4886696   | 15:75664570              | T             | A            | 0.0033             | 0.0004 | 0.0032             | 0.0004 |
| rs4886755   | 15:76298132              | A             | G            | 0.0041             | 0.0003 | 0.0041             | 0.0003 |
| rs166906    | 15:76802175              | T             | C            | 0.0039             | 0.0006 | 0.0033             | 0.0005 |
| rs17507300  | 15:83722059              | A             | G            | 0.0024             | 0.0005 | 0.0024             | 0.0004 |
| rs7169629   | 15:85191274              | C             | G            | 0.0019             | 0.0003 | 0.0018             | 0.0003 |
| rs59646751  | 15:99276521              | G             | T            | 0.002              | 0.0004 | 0.0023             | 0.0003 |
| rs193538    | 16:16127916              | G             | T            | 0.002              | 0.0004 | 0.002              | 0.0003 |
| rs438339    | 16:2003425               | T             | C            | 0.0035             | 0.0007 | 0.0035             | 0.0006 |
| rs77924615  | 16:20392332              | A             | G            | 0.0096             | 0.0005 | 0.0098             | 0.0004 |
| rs1635404   | 16:3747042               | G             | T            | 0.0024             | 0.0004 | 0.0025             | 0.0004 |
| rs9932625   | 16:51735746              | G             | A            | 0.003              | 0.0004 | 0.003              | 0.0003 |
| rs7203398   | 16:53189672              | A             | C            | 0.0027             | 0.0004 | 0.0025             | 0.0003 |
| rs7185391   | 16:68323115              | G             | T            | 0.0026             | 0.0004 | 0.0027             | 0.0004 |
| rs62053077  | 16:71643669              | G             | T            | 0.0025             | 0.0004 | 0.0021             | 0.0004 |
| rs1858800   | 16:73024276              | T             | C            | 0.0022             | 0.0004 | 0.002              | 0.0003 |
| rs154656    | 16:89708003              | T             | A            | 0.0031             | 0.0003 | 0.003              | 0.0003 |
| rs28735420  | 17:12139964              | T             | G            | 0.004              | 0.0008 | 0.0039             | 0.0006 |
| rs2349648   | 17:17017267              | G             | T            | 0.0022             | 0.0004 | 0.0017             | 0.0003 |
| rs9891340   | 17:17543846              | T             | C            | 0.0024             | 0.0004 | 0.0024             | 0.0004 |
| rs2440165   | 17:19428719              | T             | C            | 0.0041             | 0.0004 | 0.004              | 0.0003 |
| rs2411192   | 17:34882998              | T             | A            | 0.0024             | 0.0003 | 0.0024             | 0.0003 |
| rs227731    | 17:54773238              | T             | G            | 0.0018             | 0.0004 | 0.0018             | 0.0003 |
| rs35662455  | 17:56755223              | C             | G            | 0.003              | 0.0005 | 0.003              | 0.0005 |
| rs9903801   | 17:58915261              | C             | G            | 0.0049             | 0.0005 | 0.0047             | 0.0004 |
| rs9895661   | 17:59456589              | T             | C            | 0.0074             | 0.0005 | 0.0069             | 0.0004 |
| rs8866      | 17:65373979              | G             | C            | 0.0018             | 0.0004 | 0.0018             | 0.0003 |
| rs883541    | 17:66449122              | G             | A            | 0.0023             | 0.0004 | 0.0022             | 0.0003 |
| rs1719934   | 18:5585158               | A             | G            | 0.0028             | 0.0003 | 0.0026             | 0.0003 |
| rs2974751   | 19:13053034              | A             | C            | 0.0019             | 0.0004 | 0.0018             | 0.0003 |
| rs7251730   | 19:36997147              | T             | C            | 0.0024             | 0.0004 | 0.0024             | 0.0003 |
| rs78241494  | 19:37649748              | C             | T            | 0.0031             | 0.0004 | 0.003              | 0.0004 |
| rs113445505 | 19:38157969              | T             | C            | 0.0038             | 0.0004 | 0.0037             | 0.0003 |
| rs34647824  | 19:50138143              | C             | A            | 0.002              | 0.0004 | 0.0021             | 0.0004 |

| RSID        | Chromosome and base pair | Effect allele | Other allele | European ancestry  |        | Trans-ancestry     |        |
|-------------|--------------------------|---------------|--------------|--------------------|--------|--------------------|--------|
|             |                          |               |              | Effect size (beta) | SE     | Effect size (beta) | SE     |
| rs62187537  | 20:1333060               | T             | C            | 0.0038             | 0.0007 | 0.0039             | 0.0007 |
| rs1041606   | 20:14677788              | C             | T            | 0.002              | 0.0004 | 0.0021             | 0.0004 |
| rs6087579   | 20:32985155              | G             | A            | 0.003              | 0.0003 | 0.0028             | 0.0003 |
| rs2273684   | 20:33529766              | T             | G            | 0.0033             | 0.0003 | 0.0032             | 0.0003 |
| rs17216707  | 20:52732362              | C             | T            | 0.0052             | 0.0005 | 0.0051             | 0.0004 |
| rs2235826   | 20:56143169              | T             | A            | 0.0033             | 0.0005 | 0.003              | 0.0004 |
| rs72629024  | 20:62152519              | C             | G            | 0.0034             | 0.0006 | 0.0035             | 0.0005 |
| rs4408777   | 20:62706105              | G             | A            | 0.0021             | 0.0004 | 0.0021             | 0.0003 |
| rs1509117   | 20:8303120               | A             | T            | 0.0025             | 0.0004 | 0.0024             | 0.0004 |
| rs2823139   | 21:16576783              | G             | A            | 0.0027             | 0.0004 | 0.0026             | 0.0003 |
| rs2834317   | 21:35356706              | G             | A            | 0.0031             | 0.0005 | 0.0035             | 0.0005 |
| rs2244237   | 21:37818141              | T             | G            | 0.0027             | 0.0004 | 0.0027             | 0.0004 |
| rs131263    | 22:30133045              | T             | C            | 0.0023             | 0.0004 | 0.0024             | 0.0004 |
| rs80576     | 22:36539804              | G             | A            | 0.0027             | 0.0005 | 0.0028             | 0.0005 |
| rs4820324   | 22:38599857              | G             | C            | 0.0023             | 0.0004 | 0.0023             | 0.0003 |
| rs112880707 | 22:40884662              | T             | C            | 0.0056             | 0.0006 | 0.0052             | 0.0005 |
| rs738527    | 22:43112961              | T             | C            | 0.0031             | 0.0004 | 0.0032             | 0.0003 |

SE= standard error. Weights were taken from the discovery GWAS of the CKDGen study.<sup>20</sup>

**Table S5: Pairwise Pearson correlations of GRSs for eGFR and body-mass index, by study**

|                 | <b>Creatinine-based eGFR</b> | <b>BMI</b> | <b>GRS</b> | <b>GRS (Cys)</b> | <b>GRS (BUN)</b> |
|-----------------|------------------------------|------------|------------|------------------|------------------|
| <b>UKB</b>      |                              |            |            |                  |                  |
| GRS             | 0.1730*                      | -0.0037    |            |                  |                  |
| GRS (Cys)       | 0.1447*                      | -0.0031    | 0.8003*    |                  |                  |
| GRS (BUN)       | 0.1378*                      | 0.0009     | 0.7626*    | 0.7661*          |                  |
| GRS (Raw)       | 0.2005*                      | -0.0039    | 0.8898*    | 0.7062*          | 0.6731*          |
| <b>EPIC-CVD</b> |                              |            |            |                  |                  |
| GRS             | 0.1357*                      | -0.0203    |            |                  |                  |
| GRS (Cys)       | 0.1183*                      | -0.0037    | 0.7954*    |                  |                  |
| GRS (BUN)       | 0.1025*                      | -0.0199    | 0.7591*    | 0.7564*          |                  |
| GRS (Raw)       | 0.1598*                      | -0.0079    | 0.8851*    | 0.6972*          | 0.6612*          |
| <b>MVP</b>      |                              |            |            |                  |                  |
| GRS             | 0.1475*                      | -0.0021    |            |                  |                  |
| GRS (Cys)       | 0.1267*                      | 0.0029     | 0.8032*    |                  |                  |
| GRS (BUN)       | 0.1240*                      | -0.0034    | 0.6507*    | 0.6626*          |                  |
| GRS (Raw)       | 0.1670*                      | -0.0058    | 0.8894*    | 0.7090*          | 0.6934*          |

GRS was constructed using 218 European-specific eGFR (creatinine-based) associated genetic variants (n=567,460). GRS (Cys) included 127 genetic variants (out of the 218 genetic variants included in the GRS for eGFR) that were additionally associated with cystatin-C-based eGFR (n=460,826). GRS (BUN) included 121 genetic variants (out of the 218 genetic variants included in the GRS for eGFR) that were additionally associated with blood urine nitrogen (n=416,178). GRS (Raw) included all the 262 eGFR-associated index variants in CKDGen trans-ancestry analysis (n=765,348). \* Bonferroni-corrected significance (P<0.01). GRS= genetic risk score. eGFR= estimated glomerular filtration rate. BMI= body-mass index.



**Table S6: Mendelian randomization estimates of each 5 mL/min/1.73 m<sup>2</sup> lower genetically-predicted eGFR with risk of coronary heart disease and stroke**

| eGFR within studies, mL/min/1.73m <sup>2</sup> | Mean eGFR, mL/min/1.73m <sup>2</sup> | No. of participants | Coronary heart disease |                   | Stroke        |                   |
|------------------------------------------------|--------------------------------------|---------------------|------------------------|-------------------|---------------|-------------------|
|                                                |                                      |                     | No. of events          | HR (95% CI)       | No. of events | HR (95% CI)       |
| <b>EPIC-CVD</b>                                |                                      |                     |                        |                   |               |                   |
| < 60                                           | 50.1                                 | 533                 | 266                    | 1.52 (1.09, 2.13) | 103           | 2.30 (1.32, 4.02) |
| 60 - 74                                        | 69.1                                 | 1979                | 847                    | 1.10 (0.94, 1.29) | 322           | 1.13 (0.86, 1.49) |
| 75 - 89                                        | 83.3                                 | 4953                | 1760                   | 1.08 (0.97, 1.21) | 777           | 1.01 (0.85, 1.20) |
| 90 - 104                                       | 97.6                                 | 8787                | 2619                   | 1.11 (1.00, 1.23) | 1382          | 1.01 (0.88, 1.16) |
| ≥105*                                          | 111.0                                | 3569                | 658                    | 0.85 (0.71, 1.02) | 376           | 0.83 (0.64, 1.09) |
| <b>MVP</b>                                     |                                      |                     |                        |                   |               |                   |
| < 60                                           | 50.6                                 | 9241                | 1146                   | 1.18 (1.04, 1.34) | 250           | 1.10 (0.84, 1.44) |
| 60 - 74                                        | 68.3                                 | 22,916              | 2008                   | 1.06 (0.97, 1.16) | 484           | 1.17 (0.97, 1.41) |
| 75 - 89                                        | 82.9                                 | 34,890              | 2752                   | 1.05 (0.97, 1.14) | 587           | 0.92 (0.78, 1.09) |
| 90 - 104                                       | 96.4                                 | 30,130              | 2285                   | 0.94 (0.86, 1.02) | 514           | 1.10 (0.91, 1.33) |
| ≥105*                                          | 111.7                                | 8085                | 316                    | 0.98 (0.77, 1.24) | 79            | 1.41 (0.87, 2.27) |
| <b>UK Biobank</b>                              |                                      |                     |                        |                   |               |                   |
| < 60                                           | 52.4                                 | 5044                | 337                    | 0.84 (0.66, 1.08) | 138           | 1.03 (0.70, 1.53) |
| 60 - 74                                        | 69.4                                 | 28,361              | 1459                   | 1.10 (0.97, 1.23) | 512           | 1.11 (0.91, 1.34) |
| 75 - 89                                        | 83.5                                 | 83,821              | 3717                   | 1.04 (0.97, 1.11) | 1201          | 0.98 (0.87, 1.11) |
| 90 - 104                                       | 97.0                                 | 137,263             | 5069                   | 1.00 (0.94, 1.07) | 1686          | 1.07 (0.96, 1.20) |
| ≥105*                                          | 109.1                                | 34,146              | 678                    | 0.94 (0.79, 1.11) | 211           | 0.97 (0.71, 1.31) |
| <b>Combined</b>                                |                                      |                     |                        |                   |               |                   |
| < 60                                           | 51.2                                 | 14,818              | 1749                   | 1.14 (1.03, 1.27) | 491           | 1.19 (0.97, 1.47) |
| 60 - 74                                        | 68.9                                 | 53,256              | 4314                   | 1.08 (1.01, 1.15) | 1318          | 1.14 (1.01, 1.28) |
| 75 - 89                                        | 83.3                                 | 123,664             | 8229                   | 1.05 (1.00, 1.10) | 2565          | 0.97 (0.89, 1.06) |
| 90 - 104                                       | 96.9                                 | 176,180             | 9973                   | 1.01 (0.96, 1.05) | 3582          | 1.06 (0.98, 1.14) |
| ≥105*                                          | 109.7                                | 45,800              | 1652                   | 0.91 (0.82, 1.02) | 666           | 0.95 (0.79, 1.14) |

HRs are shown per 5 mL/min/1.73 m<sup>2</sup> lower genetically-predicted eGFR and are adjusted for age, age-squared, sex, study center, and the first ten principal components. \*HRs in the group with eGFR above 105 were shown per 5 mL/min/1.73 m<sup>2</sup> higher genetically-predicted eGFR. Mean eGFR within each stratum was weighted by the number of participants from each contributing study, and MR estimates within each stratum were meta-analyzed using inverse variance weighting and fixed effects.

**Table S7: Comparison of estimates from residual and doubly-ranked non-linear Mendelian randomization methods.**

| Million Veteran Program (MVP) |                         |                      |                        |                               |                      |
|-------------------------------|-------------------------|----------------------|------------------------|-------------------------------|----------------------|
| Residual method               |                         |                      | Doubly-ranked method   |                               |                      |
| Stratum                       | eGFR                    | HR (95% CI)          | eGFR                   | Genetic association with eGFR | HR (95% CI)          |
| 1                             | 51.9<br>(46.0, 61.2)    | 1.19<br>(1.04, 1.36) | 55.8<br>(47.0, 70.1)   | 2.39                          | 1.15<br>(1.01, 1.31) |
| 2                             | 65.5<br>(61.3, 69.8)    | 1.15<br>(1.01, 1.32) | 66.3<br>(55.2, 77.3)   | 2.78                          | 1.10<br>(0.97, 1.24) |
| 3                             | 71.9<br>(68.1, 75.9)    | 0.95<br>(0.83, 1.10) | 72.5<br>(62.4, 82.9)   | 2.98                          | 1.18<br>(1.05, 1.33) |
| 4                             | 77.2<br>(73.6, 80.7)    | 1.06<br>(0.92, 1.23) | 77.4<br>(67.7, 87.5)   | 3.02                          | 1.00<br>(0.89, 1.13) |
| 5                             | 82.0<br>(78.1, 86.2)    | 1.07<br>(0.94, 1.23) | 81.9<br>(72.1, 90.9)   | 2.95                          | 0.90<br>(0.80, 1.02) |
| 6                             | 87.0<br>(83.3, 90.5)    | 0.90<br>(0.78, 1.04) | 86.0<br>(77.0, 94.1)   | 2.72                          | 0.96<br>(0.84, 1.09) |
| 7                             | 90.6<br>(87.3, 93.8)    | 1.03<br>(0.89, 1.19) | 89.9<br>(81.0, 97.7)   | 2.46                          | 1.03<br>(0.89, 1.19) |
| 8                             | 94.4<br>(90.8, 97.9)    | 0.97<br>(0.84, 1.12) | 94.0<br>(86.4, 101.9)  | 2.19                          | 0.97<br>(0.83, 1.14) |
| 9                             | 99.2<br>(95.3, 103.3)   | 0.96<br>(0.83, 1.12) | 98.9<br>(90.6, 107.9)  | 1.96                          | 1.00<br>(0.82, 1.21) |
| 10                            | 109.5<br>(102.8, 114.1) | 1.35<br>(1.09, 1.66) | 106.5<br>(96.1, 113.4) | 1.81                          | 1.19<br>(0.93, 1.52) |

  

| UK Biobank      |                         |                      |                         |                               |                      |
|-----------------|-------------------------|----------------------|-------------------------|-------------------------------|----------------------|
| Residual method |                         |                      | Doubly-ranked method    |                               |                      |
| Stratum         | eGFR                    | HR (95% CI)          | eGFR                    | Genetic association with eGFR | HR (95% CI)          |
| 1               | 65.5<br>(60.4, 73.4)    | 1.04<br>(0.93, 1.16) | 69.2<br>(61.3, 81.8)    | 2.75                          | 1.06<br>(0.98, 1.15) |
| 2               | 77.4<br>(73.4, 81.4)    | 1.07<br>(0.96, 1.18) | 78.2<br>(68.0, 88.3)    | 2.91                          | 0.98<br>(0.91, 1.06) |
| 3               | 83.3<br>(79.7, 87.0)    | 0.93<br>(0.84, 1.02) | 83.5<br>(74.3, 92.0)    | 2.86                          | 1.00<br>(0.92, 1.09) |
| 4               | 88.0<br>(84.5, 91.5)    | 0.94<br>(0.85, 1.04) | 87.5<br>(79.1, 94.7)    | 2.68                          | 0.98<br>(0.90, 1.07) |
| 5               | 91.5<br>(88.3, 94.6)    | 0.86<br>(0.77, 0.95) | 90.8<br>(83.3, 97.1)    | 2.40                          | 0.94<br>(0.85, 1.04) |
| 6               | 94.2<br>(91.1, 97.3)    | 0.98<br>(0.88, 1.10) | 93.7<br>(87.2, 99.7)    | 2.13                          | 0.98<br>(0.87, 1.10) |
| 7               | 96.8<br>(93.6, 99.9)    | 1.12<br>(1.00, 1.26) | 96.5<br>(90.6, 102.3)   | 1.91                          | 1.02<br>(0.89, 1.17) |
| 8               | 99.7<br>(96.5, 102.9)   | 1.30<br>(1.15, 1.47) | 99.4<br>(93.5, 105.3)   | 1.72                          | 0.95<br>(0.81, 1.12) |
| 9               | 103.4<br>(100.0, 106.8) | 1.25<br>(1.08, 1.44) | 102.8<br>(96.7, 108.6)  | 1.52                          | 1.24<br>(1.02, 1.51) |
| 10              | 109.3<br>(104.8, 112.2) | 1.18<br>(0.99, 1.42) | 107.7<br>(101.0, 111.8) | 1.35                          | 1.46<br>(1.15, 1.85) |

Mean level of eGFR in each stratum, 10<sup>th</sup> and 90<sup>th</sup> percentiles in brackets (20<sup>th</sup> and 80<sup>th</sup> percentiles for the highest and lowest decile groups); hazard ratio (HR) for each decile group per 5 mL/min/1.73 m<sup>2</sup> lower genetically-predicted eGFR, 95% confidence interval (CI) in brackets; genetic association with eGFR per 1 standard deviation increase in the genetic risk score.

Figure S1: Distributions of creatinine measurements by study

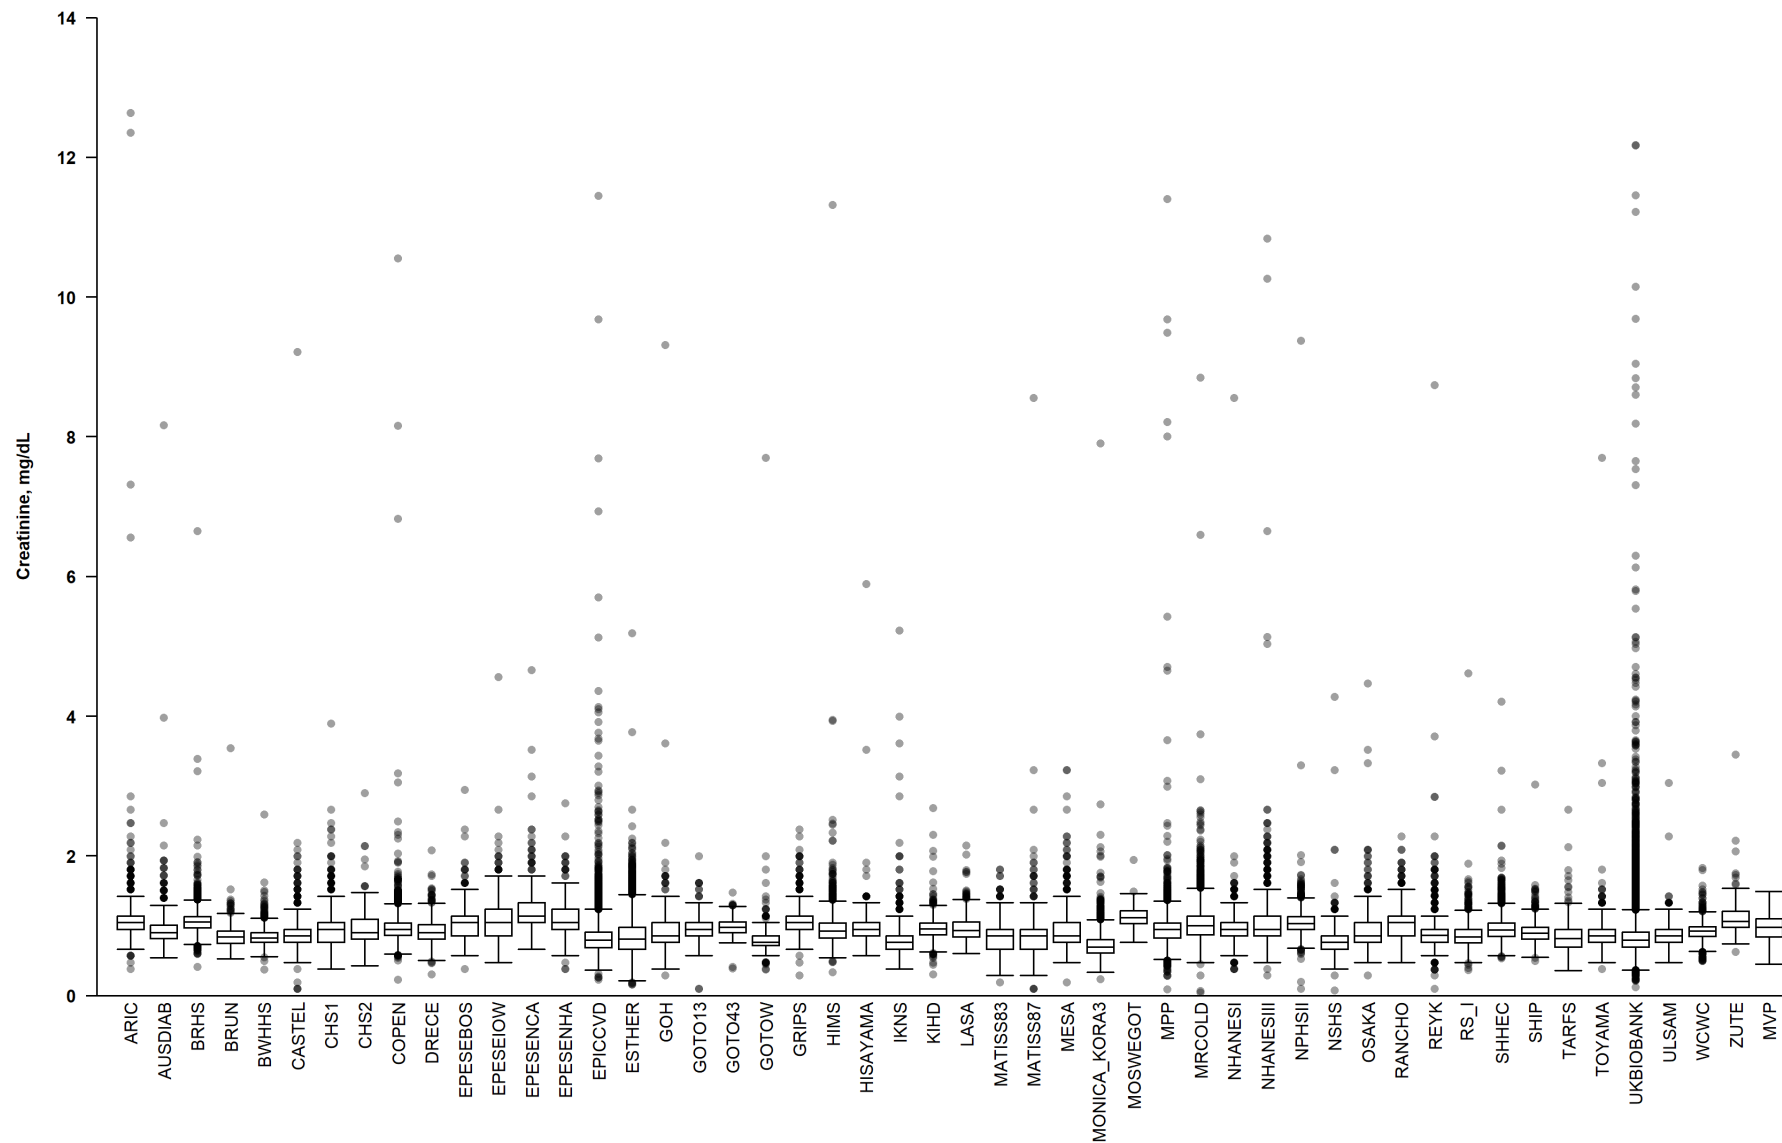

**Figure S2: Distributions of measured eGFR by study**

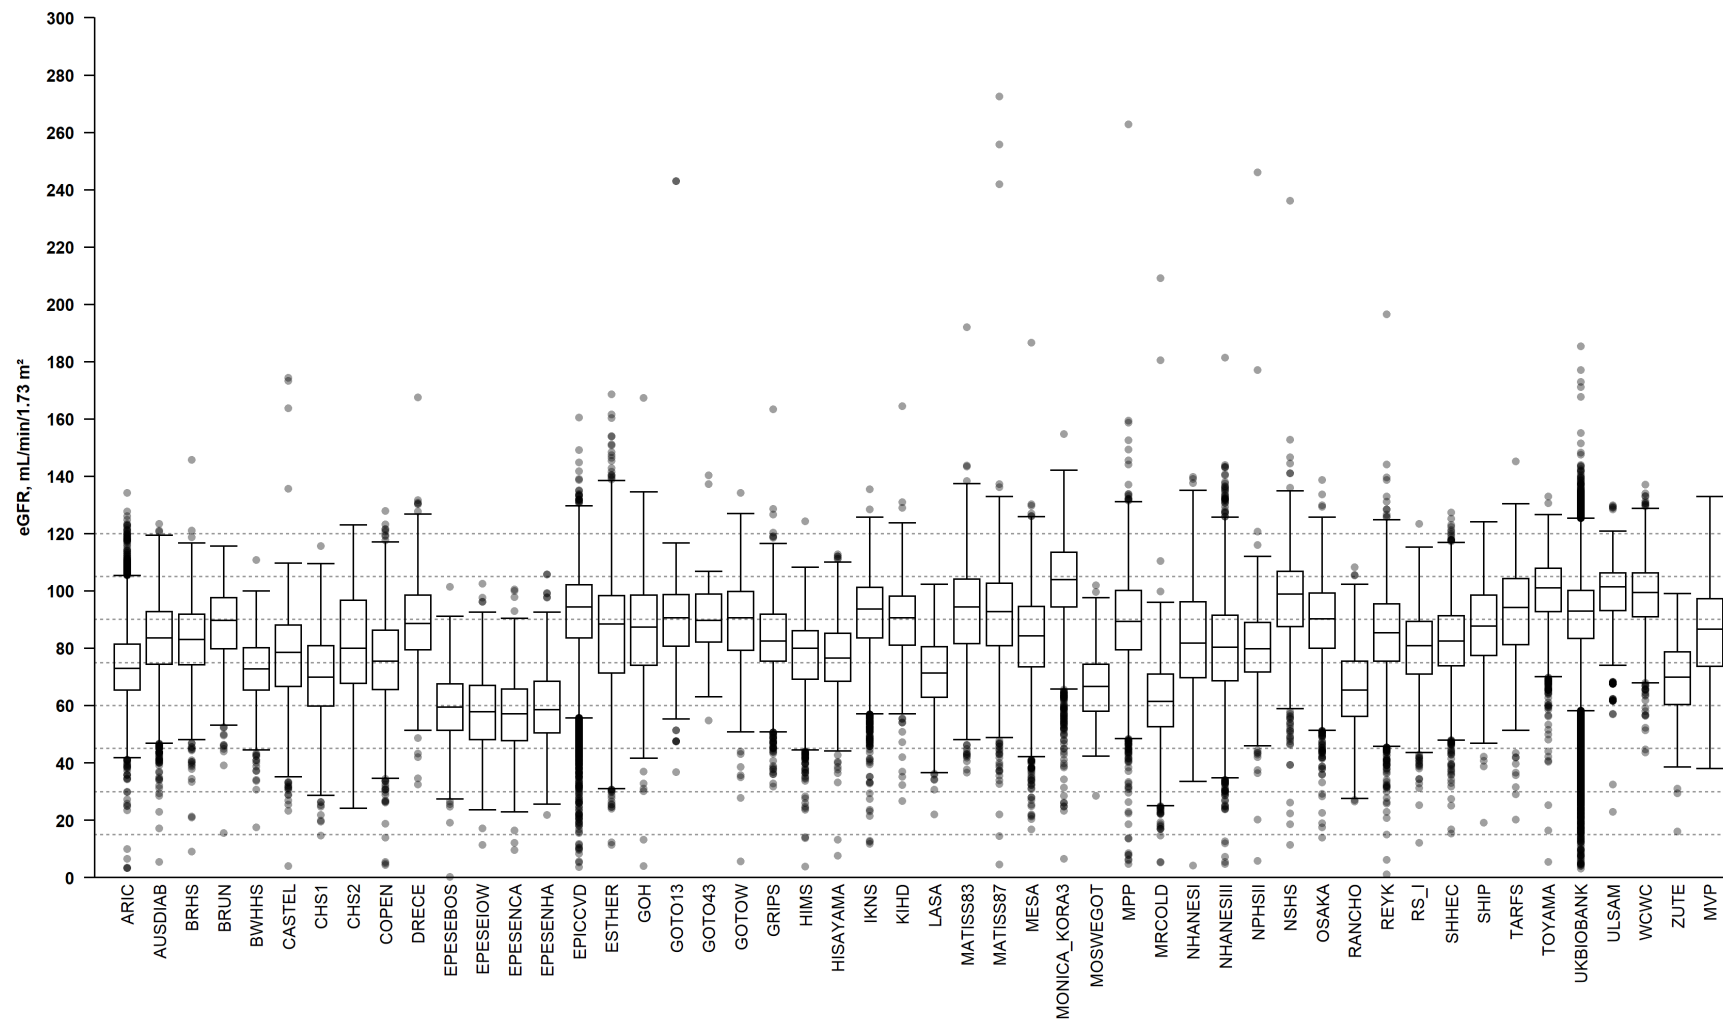

Participants with eGFR levels greater than 300 mL/min/1.73 m<sup>2</sup> were excluded from the analysis.

**Figure S3: Observational associations of creatinine-based eGFR with risk of coronary heart disease and stroke (n=648,135)**

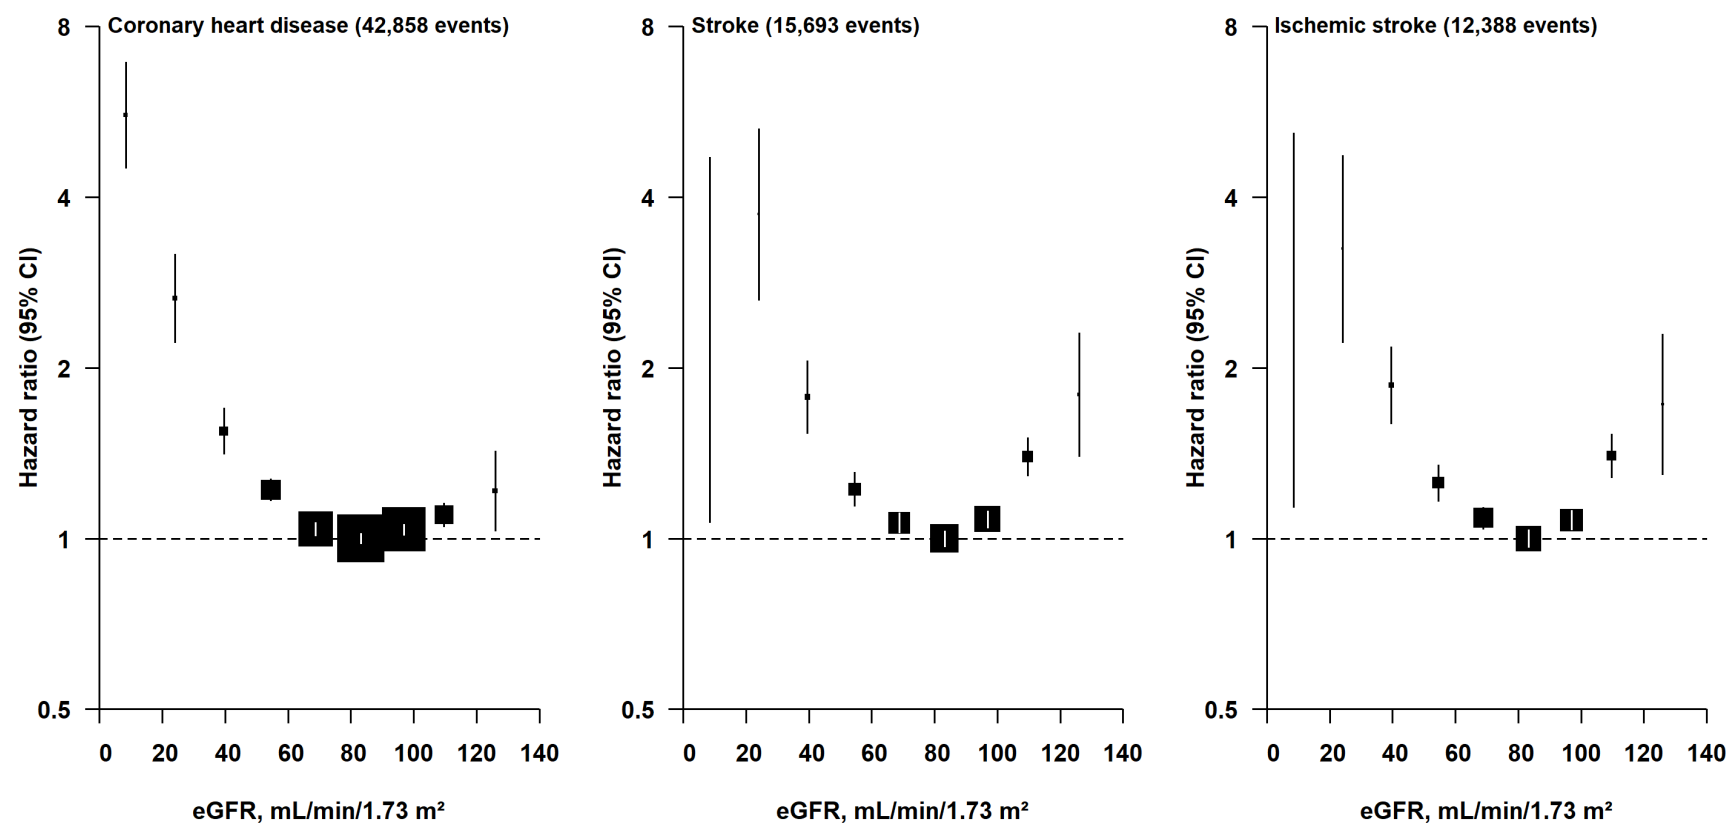

Participants with missing information on age, sex, systolic blood pressure, total and high-density lipoprotein cholesterol, body-mass index, smoking status were excluded from the analysis. Hazards ratios were estimated using Cox regression, adjusted for age, sex and study centre, where appropriate. The eGFR was estimated using creatinine-based CKD-EPI formula. The categories of eGFR are <15, 15-30, 30-44, 45-60, 60-75, 75-90, 90-105, 105-120, and ≥120 mL/min/1.73 m². The reference category is 75-90 mL/min/1.73 m². Hazards ratios were plotted against the mean eGFR in each category. Sizes of the boxes are proportional to the inverse of the variance of the log risk within that specific group. Vertical lines represented 95% confidence intervals.

**Figure S4: Observational associations of creatinine-based eGFR with risk of coronary heart disease and stroke by sex, smoking, adiposity and hypertension.**

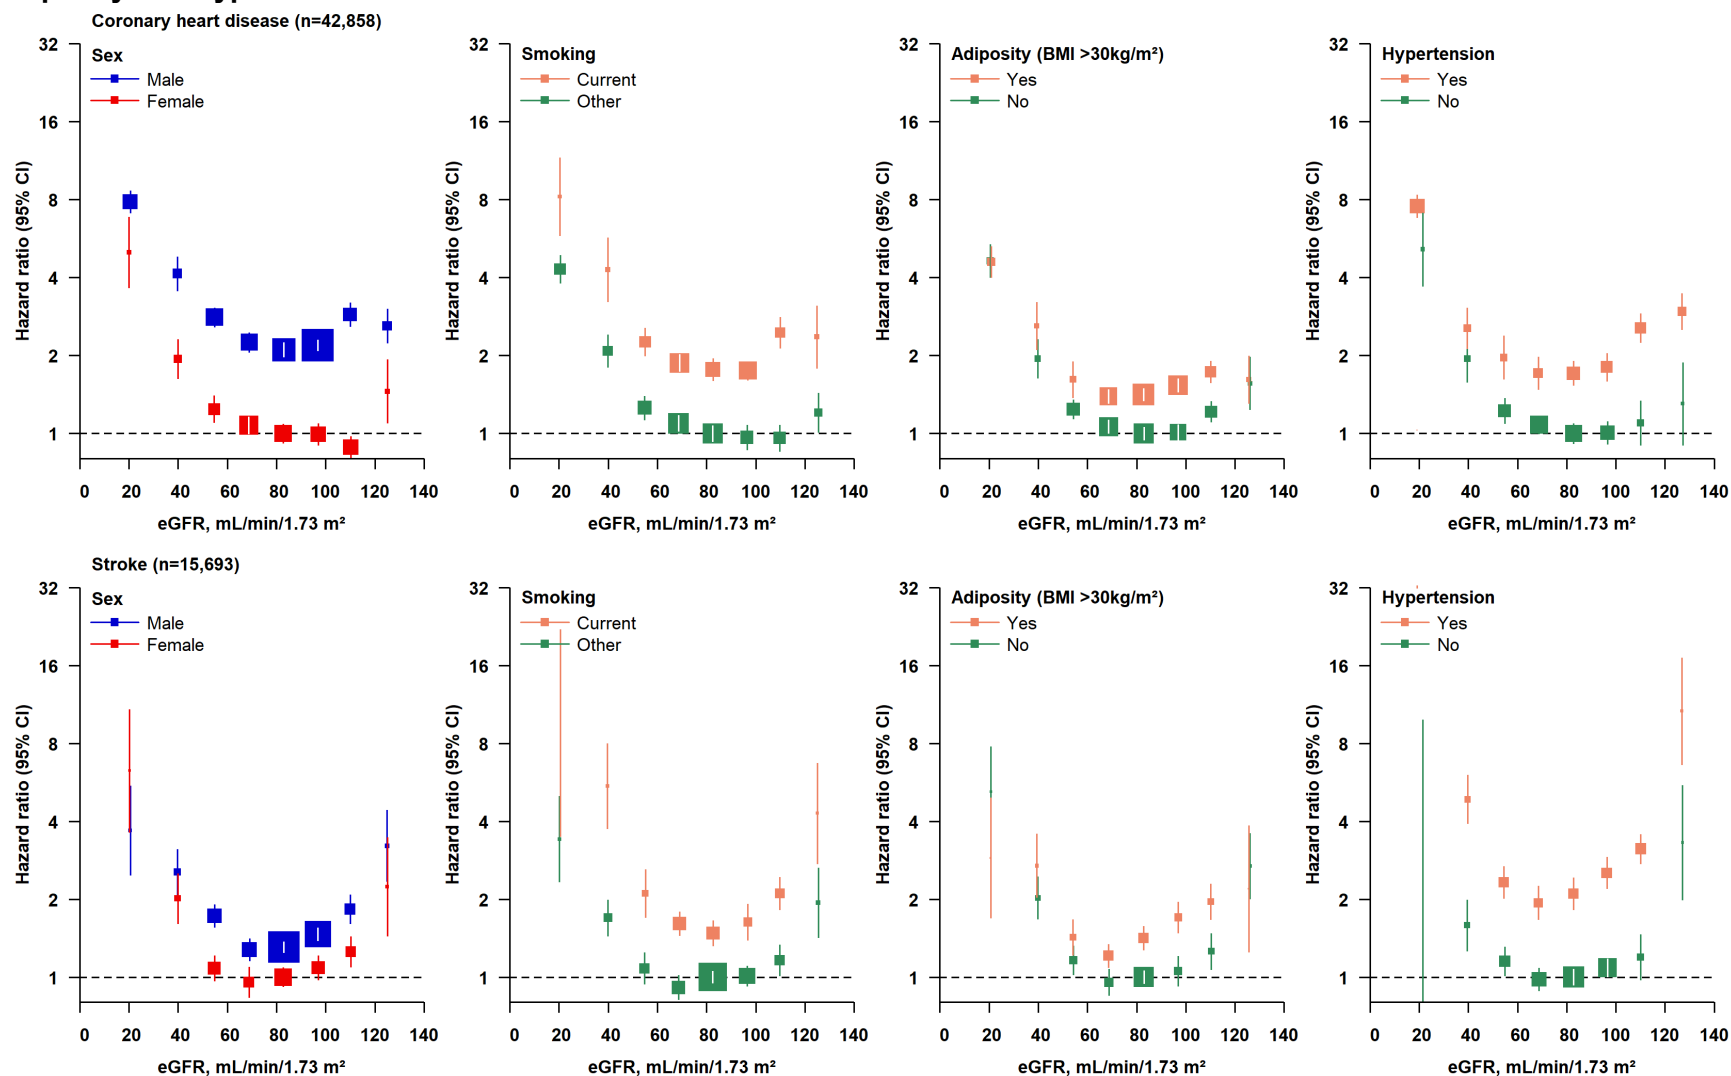

Participants with missing information on age, sex, systolic blood pressure, total and high-density lipoprotein cholesterol, body-mass index, smoking status were excluded from the analysis. Hazards ratios were estimated using Cox regression, adjusted for age, sex and study centre. The categories of eGFR are <30, 30-44, 45-60, 60-75, 75-90, 90-105, 105-120, and  $\geq 120$  mL/min/1.73 m<sup>2</sup>. The reference category is 75-90 mL/min/1.73 m<sup>2</sup> in females, non-smokers, participants with no history of diabetes, or hypertension in the respective panels. Hazards ratios were plotted against the mean eGFR in each category. Sizes of the boxes are proportional to the inverse of the log risk in that specific group. Vertical lines represented 95% confidence intervals. Hypertension was defined as recorded prior history of hypertension or systolic blood pressure  $\geq 140$  mm Hg and diastolic blood pressure  $\geq 90$  mm Hg.

**Figure S5: Observational associations of creatinine-based eGFR with risk of coronary heart disease and stroke, by contributing study**

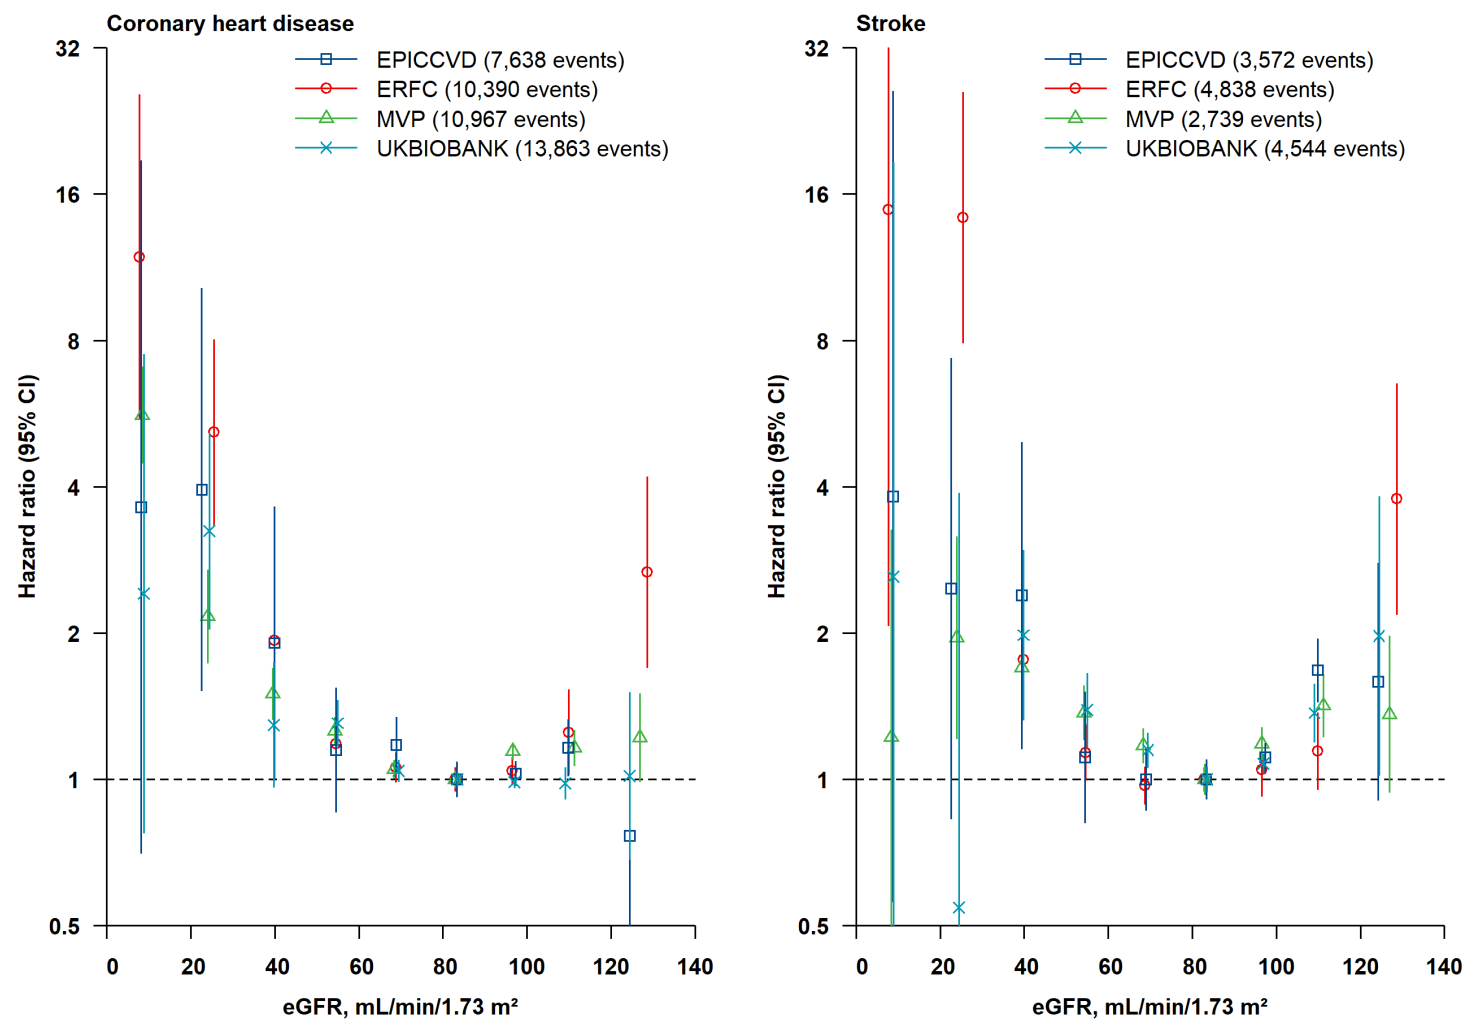

Participants with missing information on age, sex, systolic blood pressure, total and high-density lipoprotein cholesterol, body-mass index, smoking status were excluded from the analysis. Hazards ratios were estimated using Cox regression, adjusted for age, and systolic blood pressure, total and high-density lipoprotein cholesterol, body-mass index, and smoking status, and stratified by sex and study center, where appropriate. The eGFR was estimated using creatinine-based CKD-EPI formula. The categories of eGFR are <15, 15-<30, 30-<44, 45-<60, 60-<75, 75-<90, 90-<105, 105-<120, and  $\geq 120$  mL/min/1.73 m<sup>2</sup>. The reference category is 75-<90 mL/min/1.73 m<sup>2</sup>. Hazards ratios were plotted against the mean eGFR in each category, with vertical lines representing 95% confidence intervals.

**Figure S6: Observational association of creatinine-based eGFR with risk of coronary heart disease and stroke, *irrespective of diabetes status at recruitment* (n=732,808)**

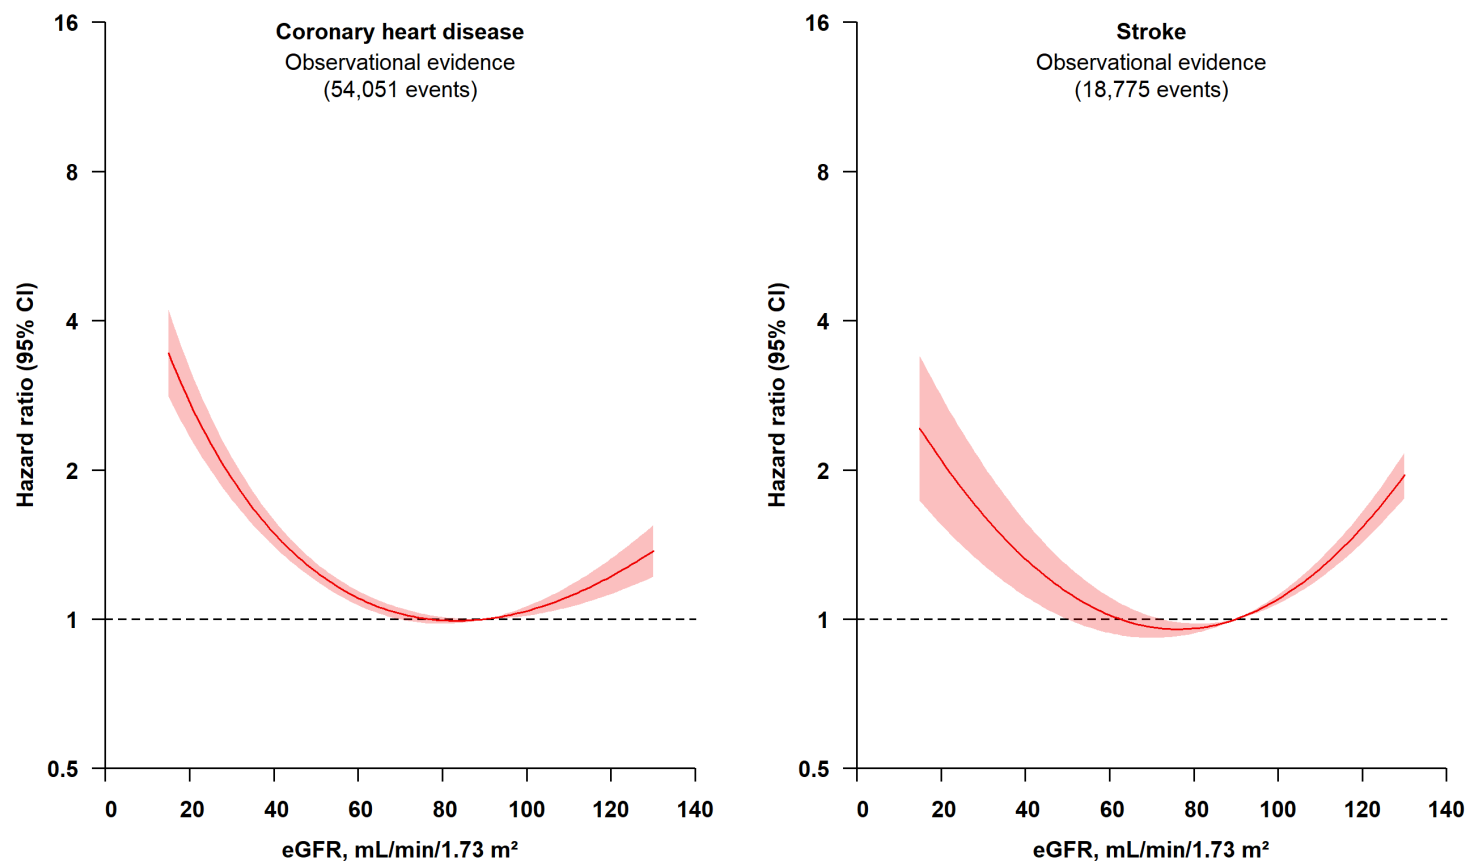

Participants with missing information on age, sex, systolic blood pressure, total and high-density lipoprotein cholesterol, body-mass index, smoking status were excluded from the analysis. Hazards ratios were estimated using Cox regression, adjusted for age, and systolic blood pressure, total and high-density lipoprotein cholesterol, body-mass index, and smoking status, and stratified by sex and study center. eGFR was estimated using creatinine-based CKD-EPI formula. The reference point is 90 mL/min/1.73 m<sup>2</sup>. Shaded regions indicate 95% confidence interval.



**Figure S7: Observational association of creatinine-based eGFR with risk of coronary heart disease and stroke, with / without complete information on vascular risk factors**

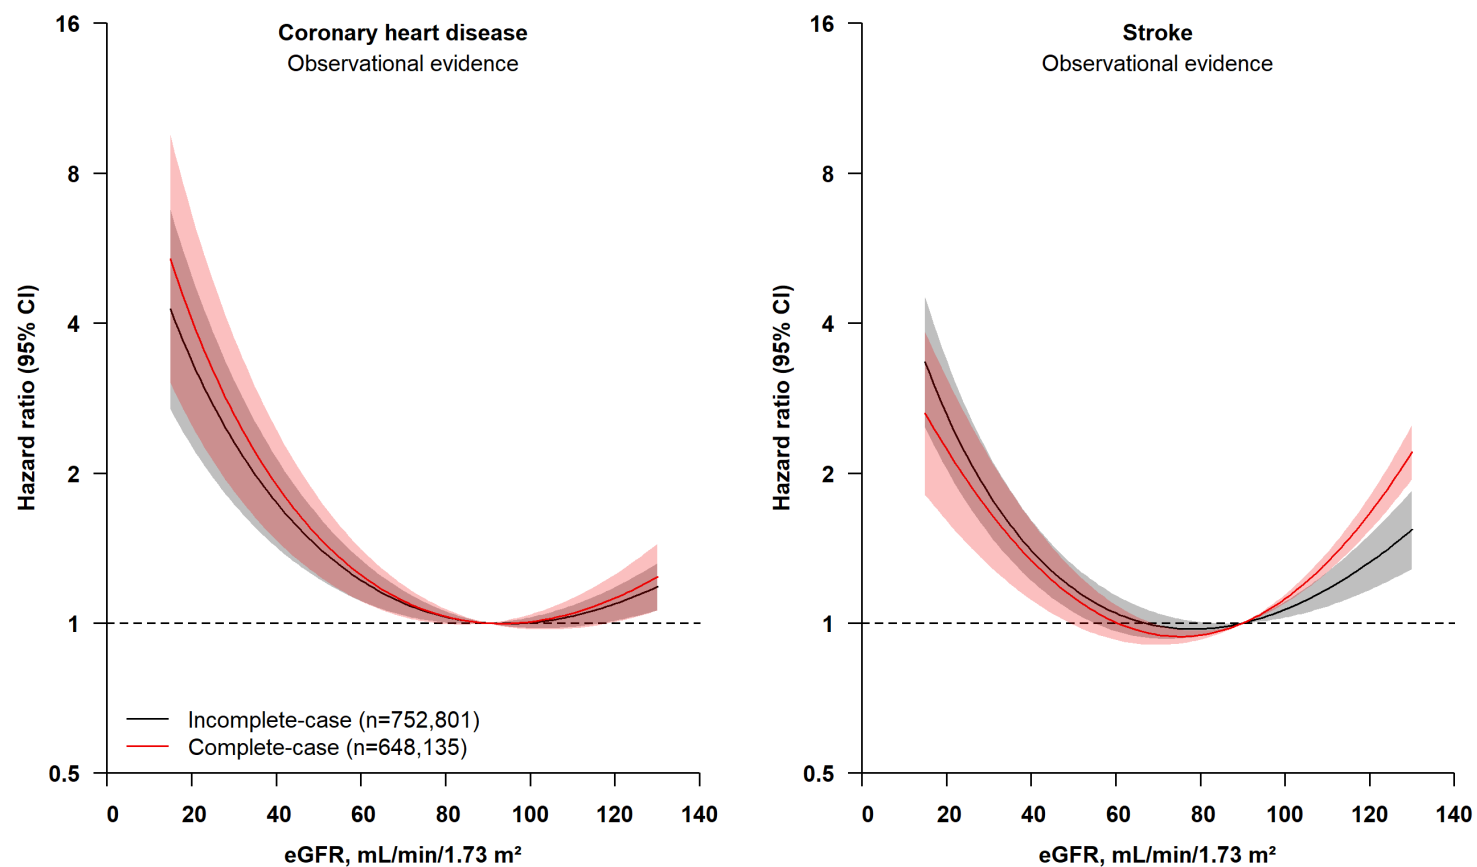

Incomplete-case included participants with information on age, sex, creatinine measurements; and complete-case included participants with complete information on age, sex, creatinine measurement, systolic blood pressure, total and high-density lipoprotein cholesterol, body-mass index, smoking status. Hazards ratios were estimated using Cox regression, adjusted for age, and systolic blood pressure, total and high-density lipoprotein cholesterol, body-mass index, and smoking status, and stratified by sex and study center. eGFR was estimated using creatinine-based CKD-EPI formula. The reference point is 90 mL/min/1.73 m<sup>2</sup>. Shaded regions indicate 95% confidence intervals.

**Figure S8: Observational associations of eGFR, estimated using creatinine or cystatin-C, with risk of coronary heart disease and stroke**

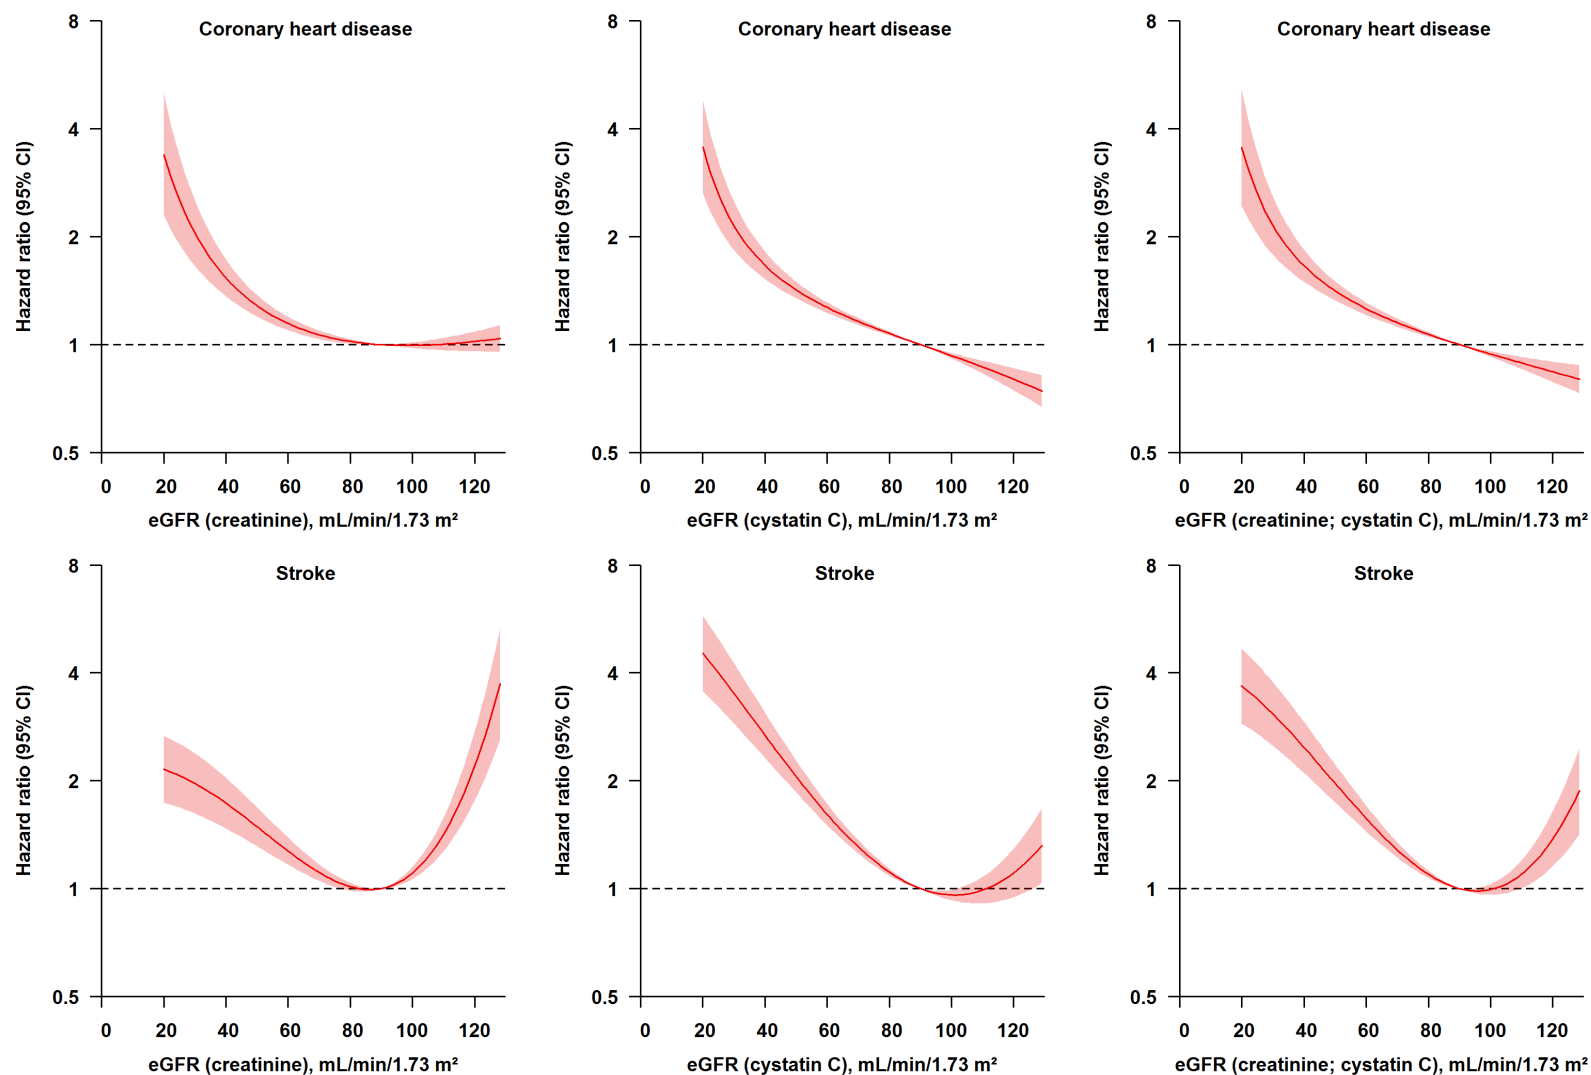

Participants with missing information on age, sex, systolic blood pressure, total and high-density lipoprotein cholesterol, body-mass index, smoking status were excluded from the analysis. Hazards ratios were estimated using Cox regression, adjusted for age, and systolic blood pressure, total and high-density lipoprotein cholesterol, body-mass index, and smoking status, and stratified by sex and study center. The reference point is 90 mL/min/1.73 m<sup>2</sup>. Shaded regions indicate 95% confidence intervals.

**Figure S9: Observational associations of urinary albumin and urinary albumin-creatinine ratio with risk of coronary heart disease and stroke in UK Biobank**

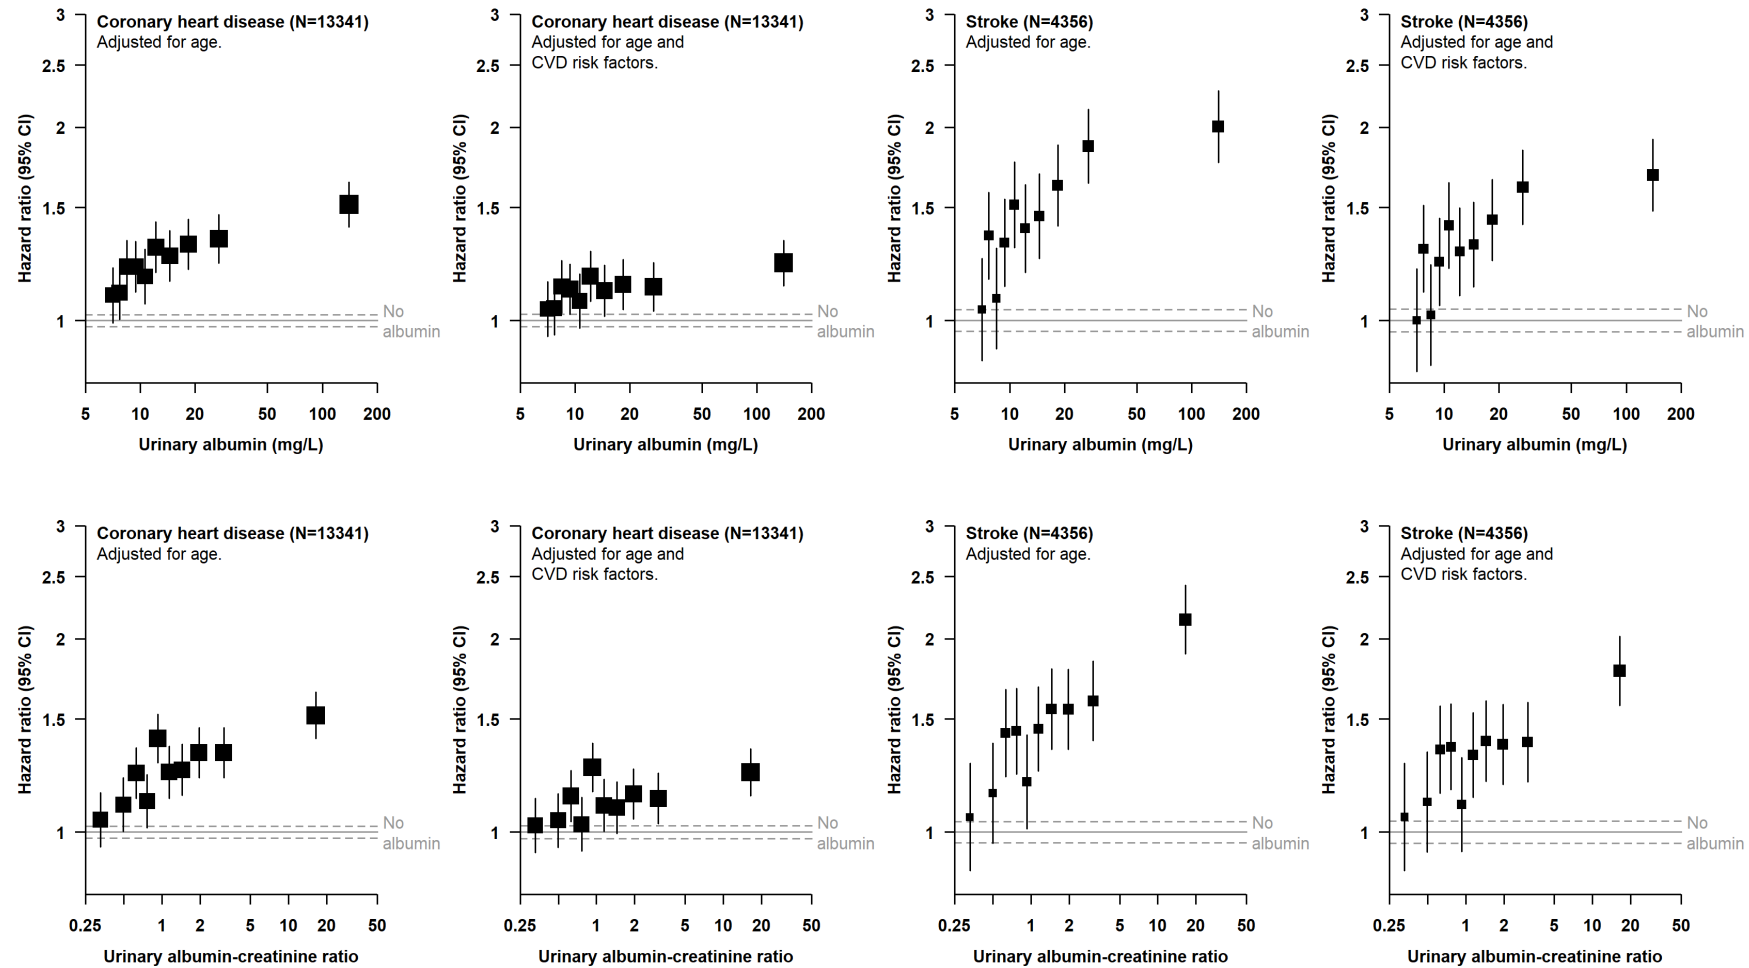

Participants with missing information on age, sex, systolic blood pressure, total and high-density lipoprotein cholesterol, body-mass index, smoking status were excluded from the analysis. Participants were divided into deciles based on their detectable urinary albumin value (i.e.,  $\geq 6.7$  mmol/L), with an extra category grouping those with urinary albumin below the detection limit (indicated as no albumin). The group with no albumin measurements was the reference category. Hazards ratios were estimated using Cox regression, and plotted against the mean levels of the urinary marker in each category. Sizes of the boxes are proportional to the inverse of the variance of the log risk within that specific group. Vertical lines represent 95% confidence intervals. Dashed lines above and below 1 indicated the 95% confidence interval for the reference category calculated using the method of floating absolute risk.

**Figure S10: Observational association of creatinine-based eGFR with risk of coronary heart disease and stroke in UK Biobank, by presence of urinary microalbumin**

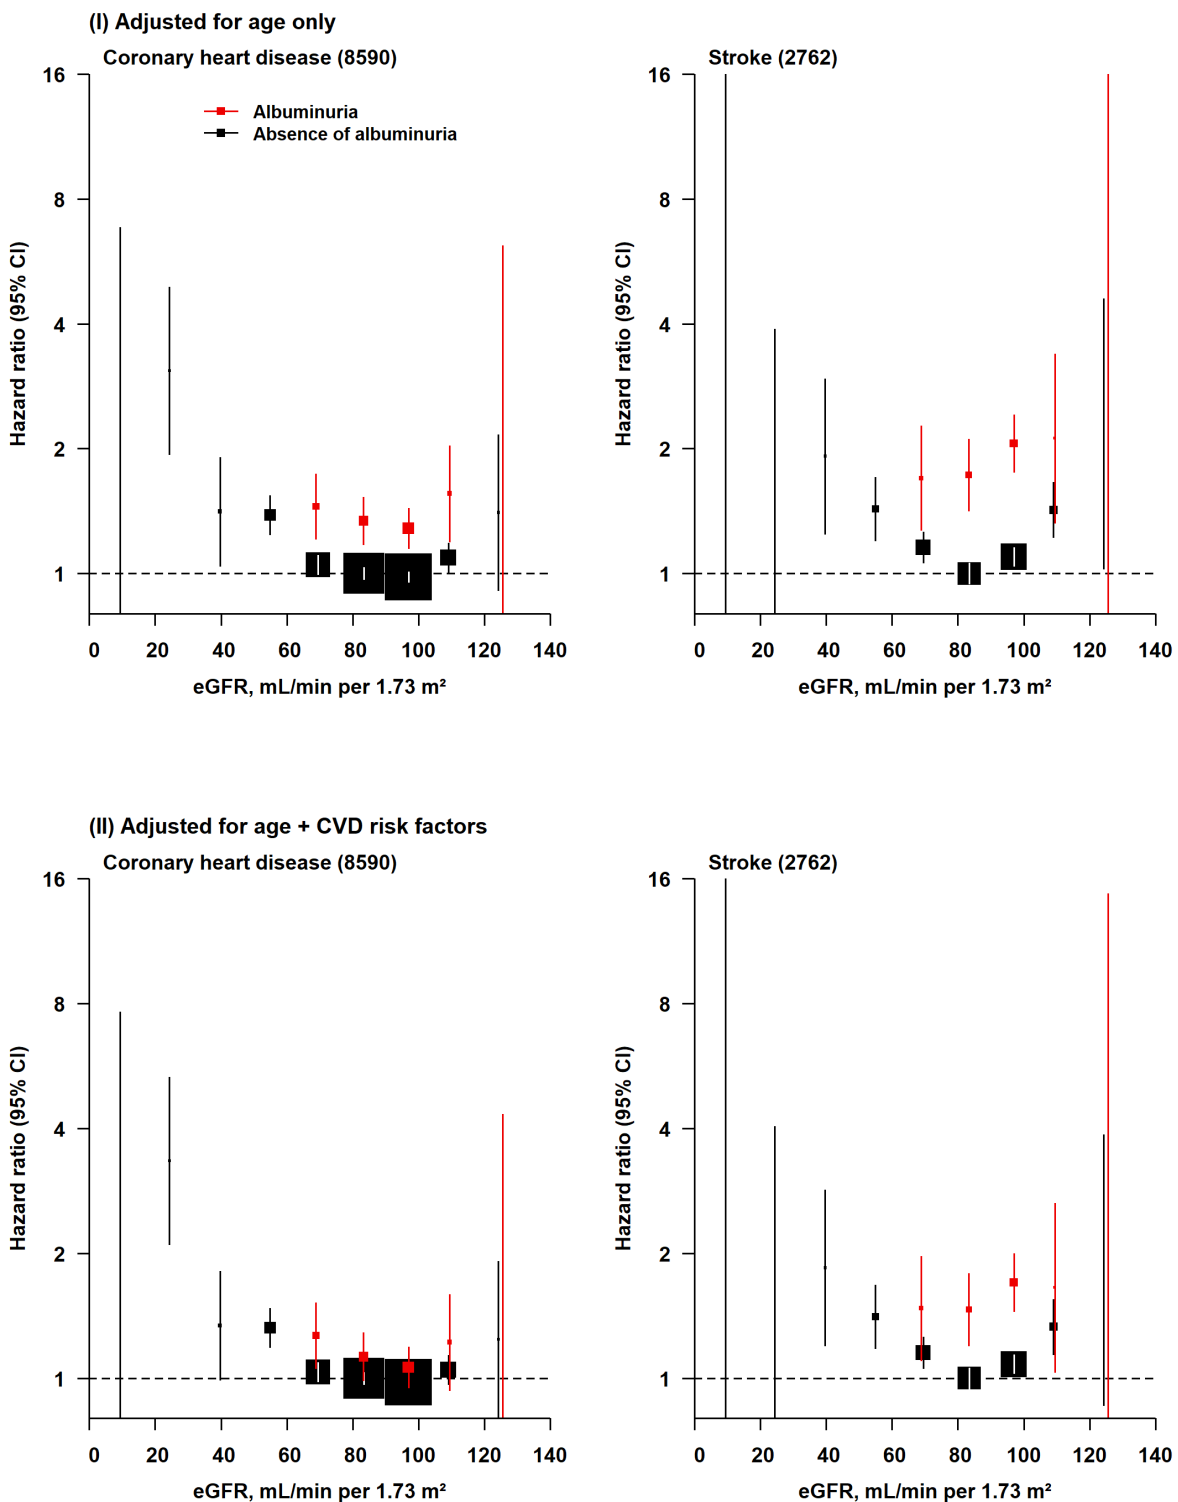

Participants with missing information on age, sex, systolic blood pressure, total and high-density lipoprotein cholesterol, body-mass index, smoking status were excluded from the analysis. Hazards ratios were estimated using Cox regression, adjusted for age, and stratified by sex. Full adjustment included further adjustment for systolic blood pressure, body-mass index, total cholesterol, HDL cholesterol, smoking, and use of lipid-lowering treatments. eGFR was estimated using creatinine-based CKD-EPI formula. The categories of eGFR are <15, 15-30, 30-45, 45-60, 60-75, 75-90, 90-105, 105-120, and  $\geq 120$  mL/min/1.73 m<sup>2</sup>. The reference category is 75-90 mL/min/1.73 m<sup>2</sup> with no urinary microalbumin. Hazards ratios are plotted against the mean eGFR within that category, and vertical lines represent 95% confidence interval.

**Figure S11: Associations of the genetic risk scores for eGFR with kidney function biomarkers and traditional vascular risk factors**

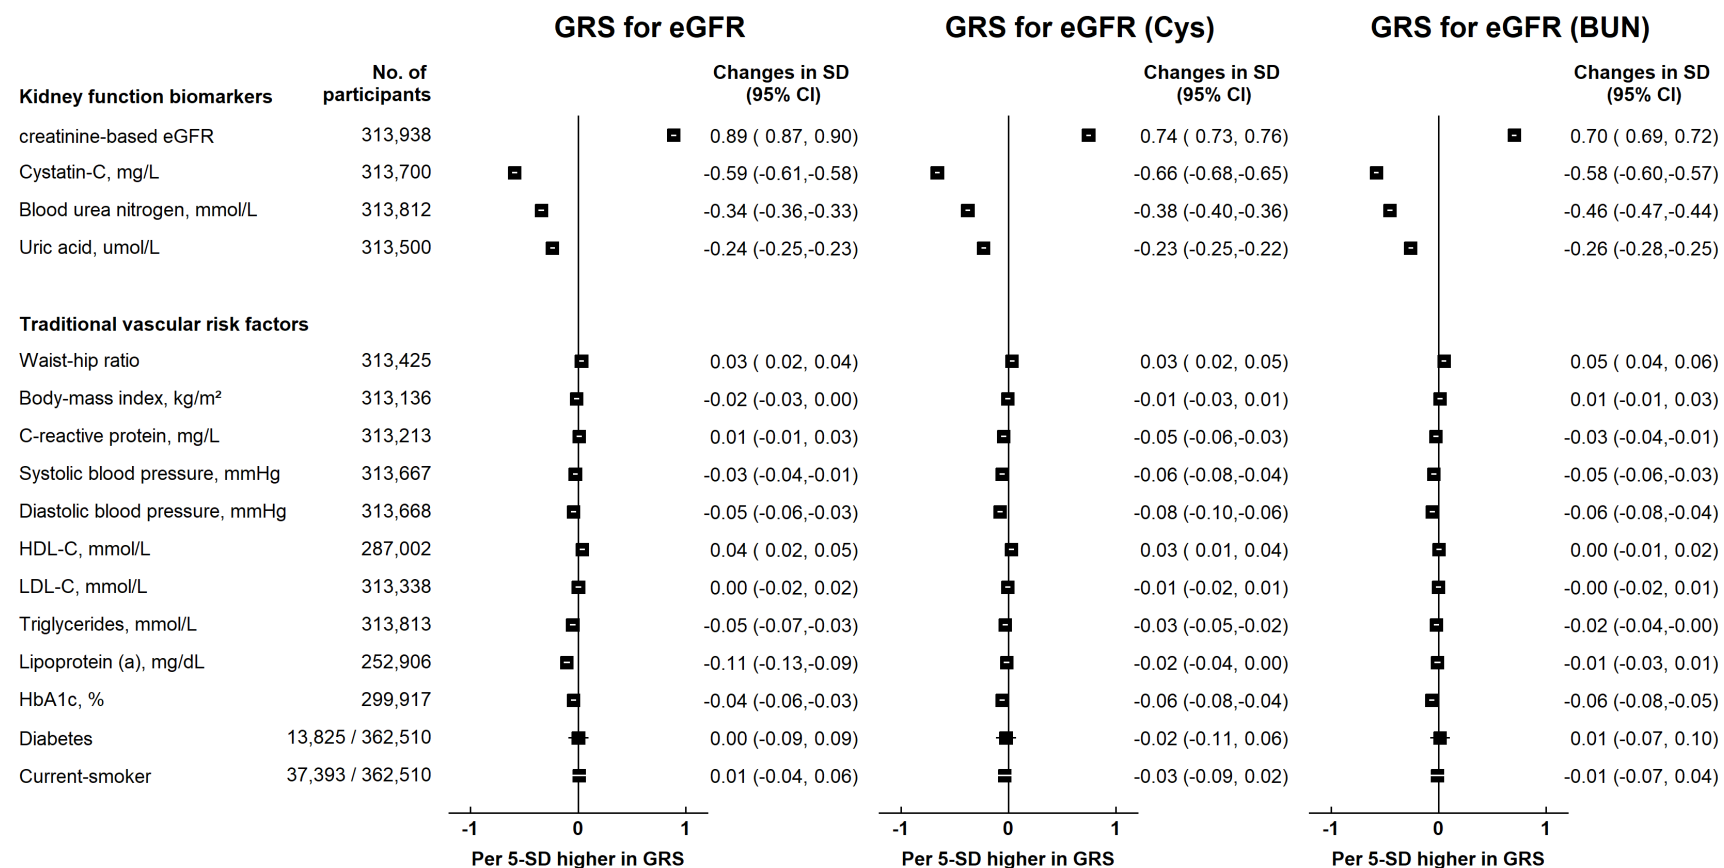

GRS was constructed using 218 eGFR (creatinine-based) associated genetic variants reported in CKDGen (n=567,460). GRS (Cys) included 127 genetic variants (out of the 218 genetic variants included in the GRS for eGFR) that were additionally associated ( $P < 5 \times 10^{-8}$ ) with cystatin-C-based eGFR (n=460,826). GRS (BUN) included 121 genetic variants (out of the 218 genetic variants included in the GRS for eGFR) that were additionally associated ( $P < 5 \times 10^{-8}$ ) with blood urine nitrogen (n=416,178). The analyses were conducted in UKB and restricted to participants of European ancestry, not on lipid-lowering treatment, without prior history of cardiovascular diseases or diabetes at baseline, where appropriate. Analyses were adjusted for age, age-squared, sex, study centre, the first ten principal components. For continuous traits, general linear regression was used to estimate SD differences in all traits (after rank inverse normal transformation) per 1 SD. higher GRS. For binary traits, logistic regression was used to estimate log odds ratio differences per 1 SD. higher GRS. Results were shown for each per 5-SD higher in GRS. SD= standard derivation. GRS= genetic risk score.

**Figure S12: Associations of the GRSs for eGFR with 167 NMR-measured metabolites**

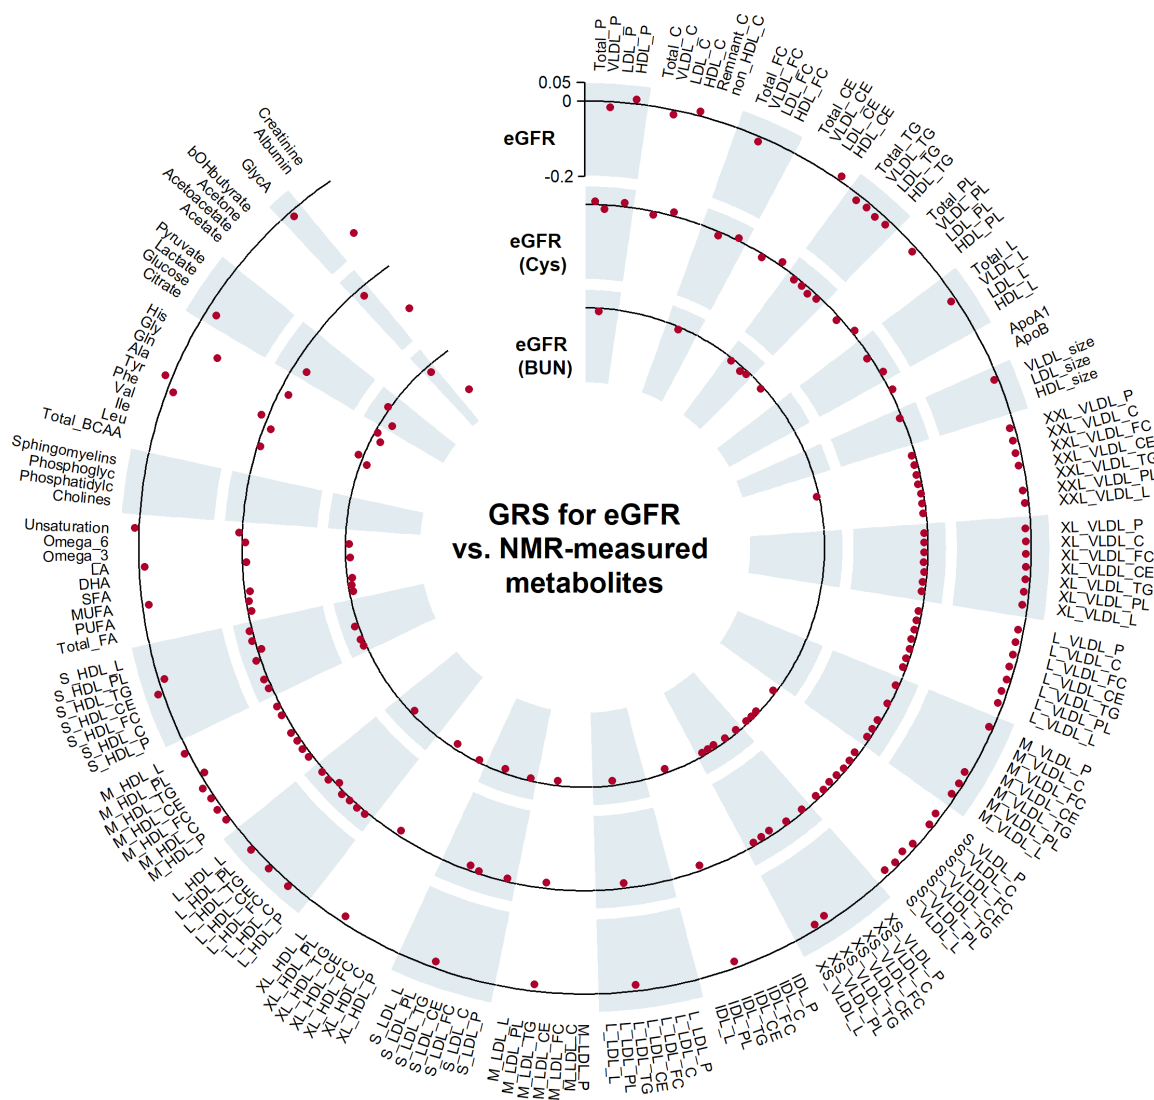

GRS was constructed using 218 eGFR (creatinine-based) associated genetic variants (n=567,460). GRS (Cys) included 127 genetic variants (out of the 218 genetic variants included in the GRS for eGFR) that were additionally associated with cystatin-C-based eGFR (n=460,826). GRS (BUN) included 121 genetic variants (out of the 218 genetic variants included in the GRS for eGFR) that were additionally associated with blood urine nitrogen (n=416,178). The analyses were conducted in a subset of UK Biobank study (n=79,413), with European ancestry, not on lipid-lowering treatments, and had no prior history of diabetes or vascular disease at baseline. Estimates were adjusted for age, sex, study center, the first ten principal components. Points shown represent estimates for each metabolite per SD higher GRSs that fell below Bonferroni-corrected significant ( $P < 3.0 \times 10^{-4}$ ). XXL= chylomicrons and extremely large. XL= extra large. L= large. M= medium. S= small. XS= very small. VLDL= very low-density lipoprotein. LDL= low-density lipoprotein. HDL= high-density lipoprotein. TG= triglycerides. P= particle concentrations. C= cholesterol. FC= free cholesterol. EC= esterified cholesterol. PL= phospholipids. L= total lipids. D= particle size. FA= fatty acids. LA= linoleic acid. PUFA= polyunsaturated fatty acids. MUFA= monounsaturated fatty acids.

**Figure S13: Mendelian randomization estimates of genetically-predicted eGFR with risk of coronary heart disease and stroke (n=413,718)**

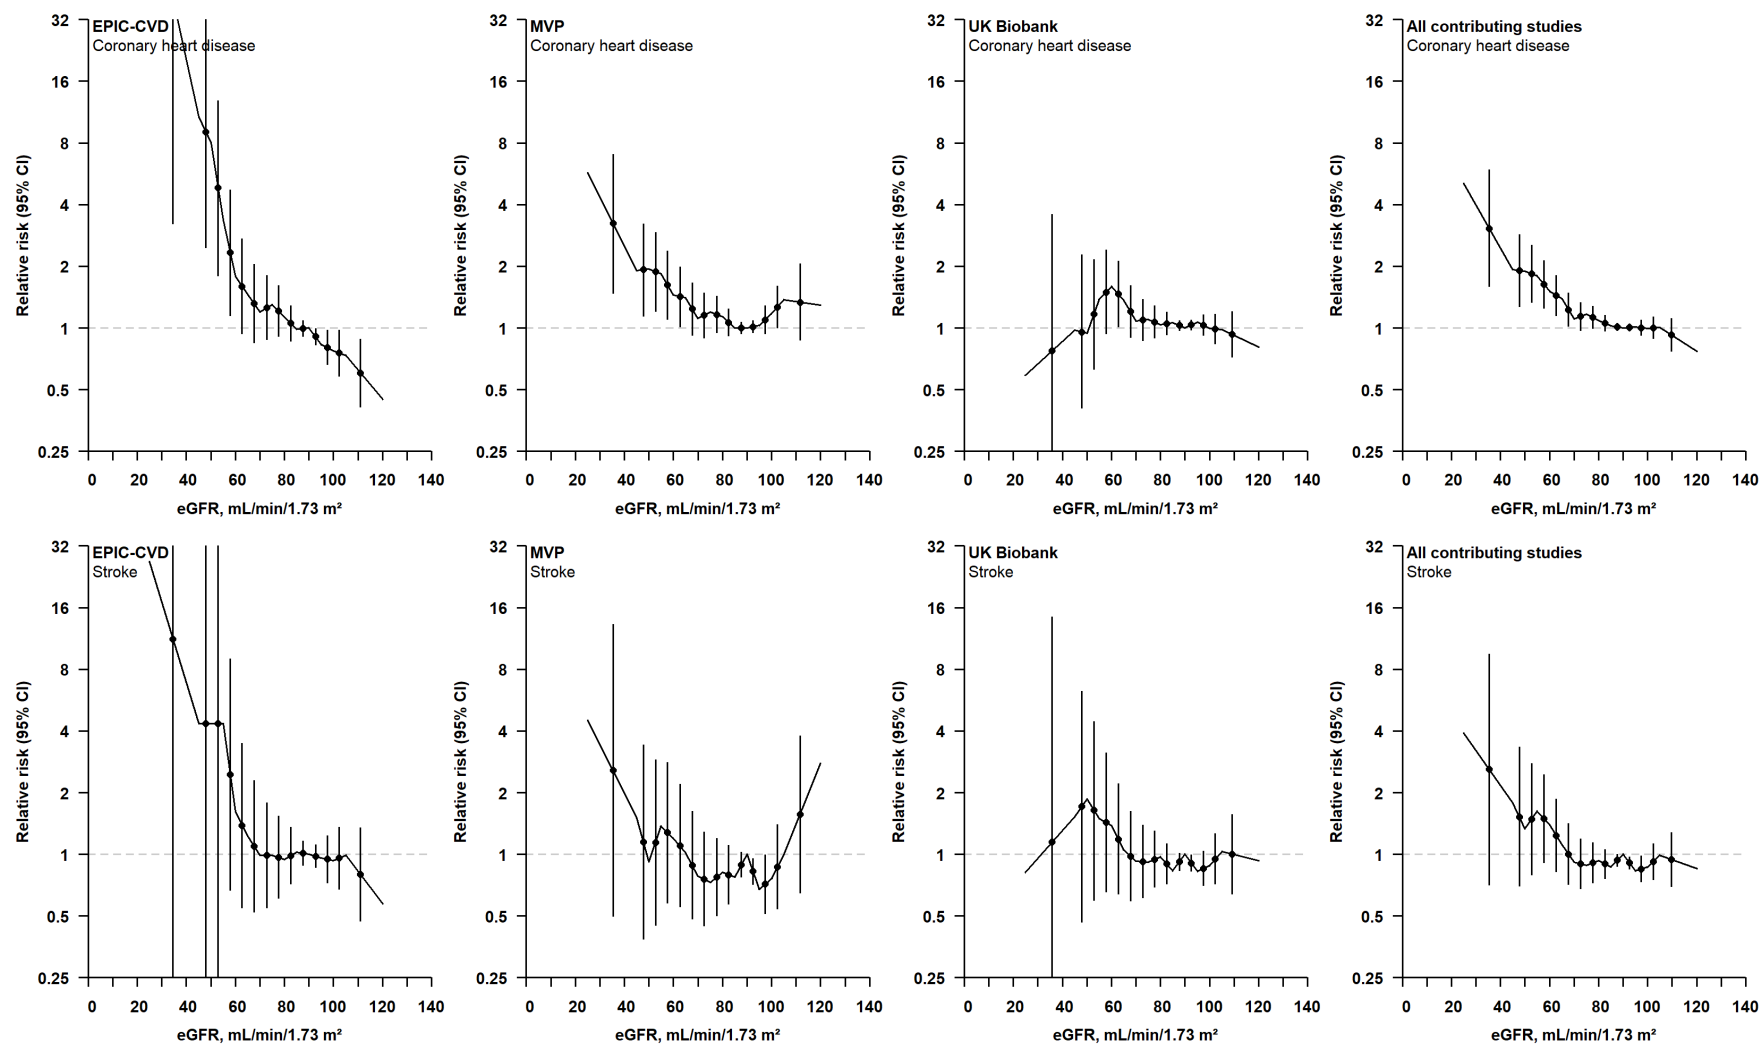

The reference point is 90 mL/min/1.73 m<sup>2</sup>. Gradients at each point of the curve represent the localized average causal effect on coronary heart disease or stroke per 5 mL/min/1.73 m<sup>2</sup> change in genetically-predicted eGFR. Vertical lines represent 95% confidence intervals. Analyses were adjusted for age, age-squared, sex, study center, and the first ten principal components.

**Figure S14: Comparison of non-linear Mendelian randomization methods.**

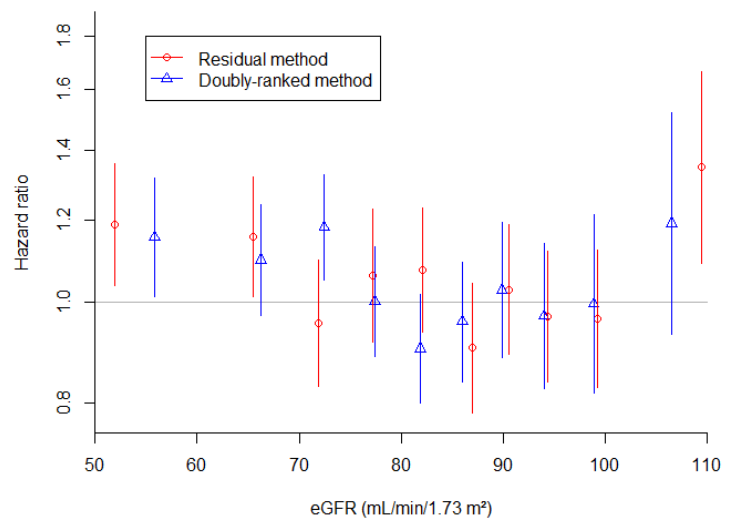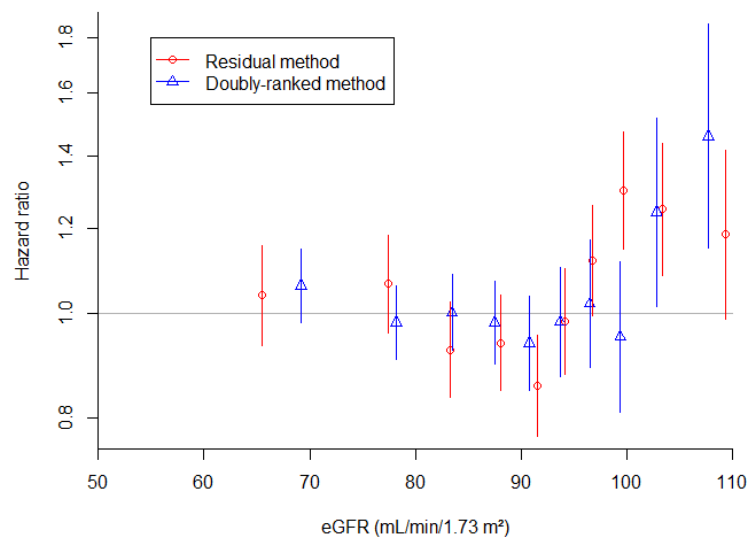

Hazard ratios from the residual method (red circles) and doubly-ranked method (blue triangles) representing the HR per 5 mL/min/1.73 m<sup>2</sup> lower genetically-predicted eGFR in decile groups: (top) Million Veteran Program, (bottom) UK Biobank. Error bars represent 95% confidence intervals.



**Figure S15: Mendelian randomization estimates of genetically-predicted eGFR with risk of coronary heart disease, stroke, and ischemic stroke, *adjusted for other factors* (n=408,021)**

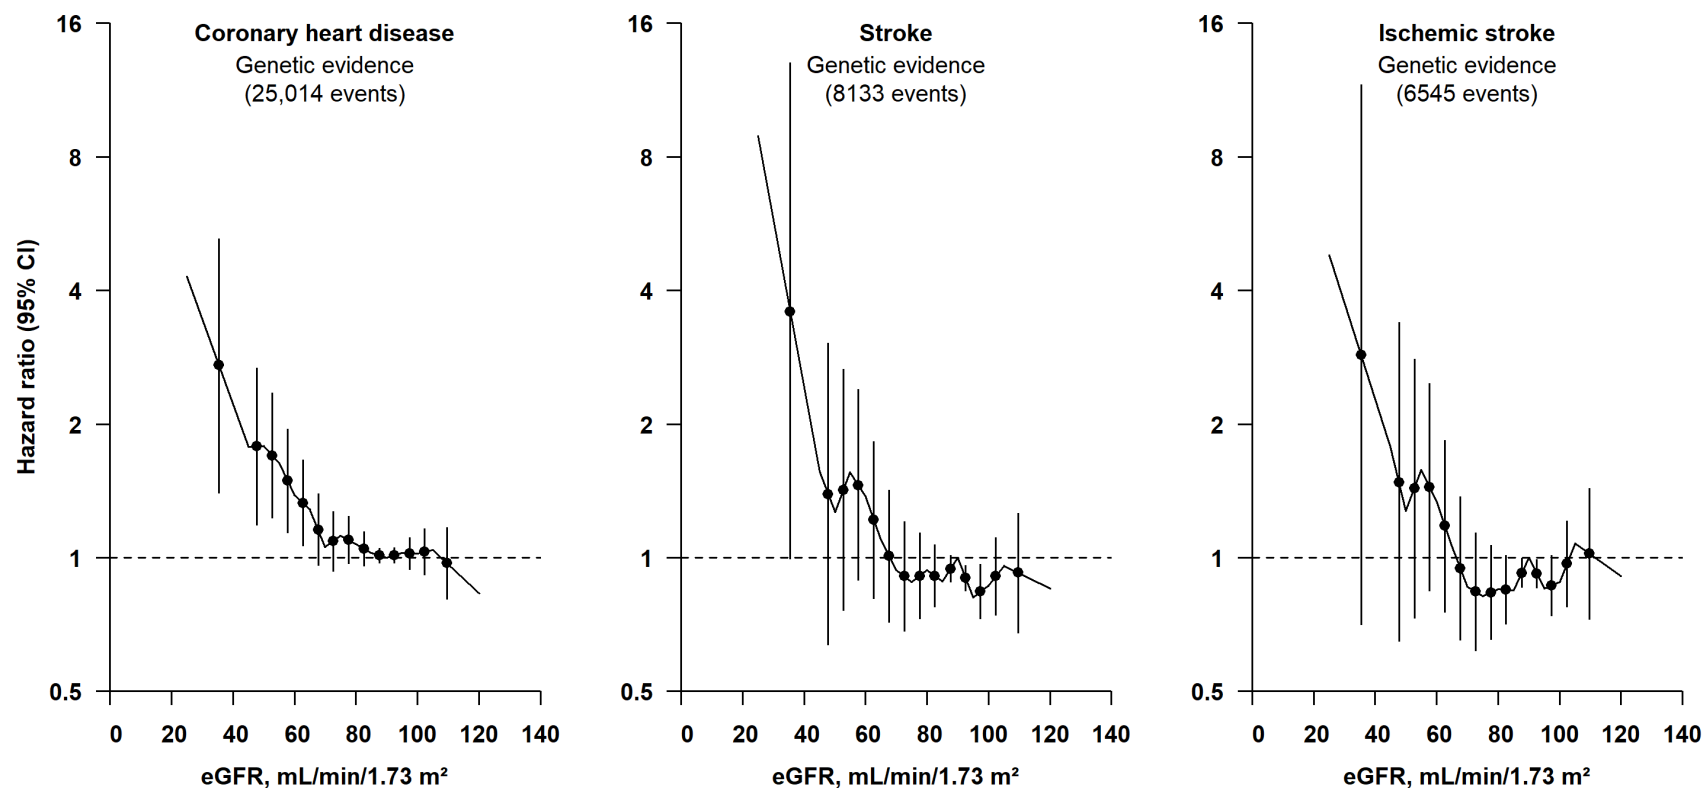

Stratum-specific localized average casual effect estimates were adjusted for age, age-squared, sex, study center, and the first ten principal components, with additional adjustment for vascular traits associated with the eGFR GRS, (systolic blood pressure, lipoprotein [a], hemoglobin A1c, and triglycerides). To maximize the number of participants with complete information on those vascular traits, we used genetically-predicted lipoprotein (a),<sup>20</sup> genetically-predicted hemoglobin A1c,<sup>21</sup> and genetically-predicted triglycerides,<sup>22</sup> instead of the measured levels. The reference point is 90 mL/min/1.73 m<sup>2</sup>. Gradients at each point of the curve represent the localized average causal effect on coronary heart disease or stroke per 5 mL/min/1.73 m<sup>2</sup> change in genetically-predicted eGFR. Vertical lines represent 95% confidence intervals.

**Figure S16: Mendelian randomization estimates of genetically-predicted eGFR with risk of coronary heart disease and stroke, irrespective of diabetes status at recruitment (n=463,051)**

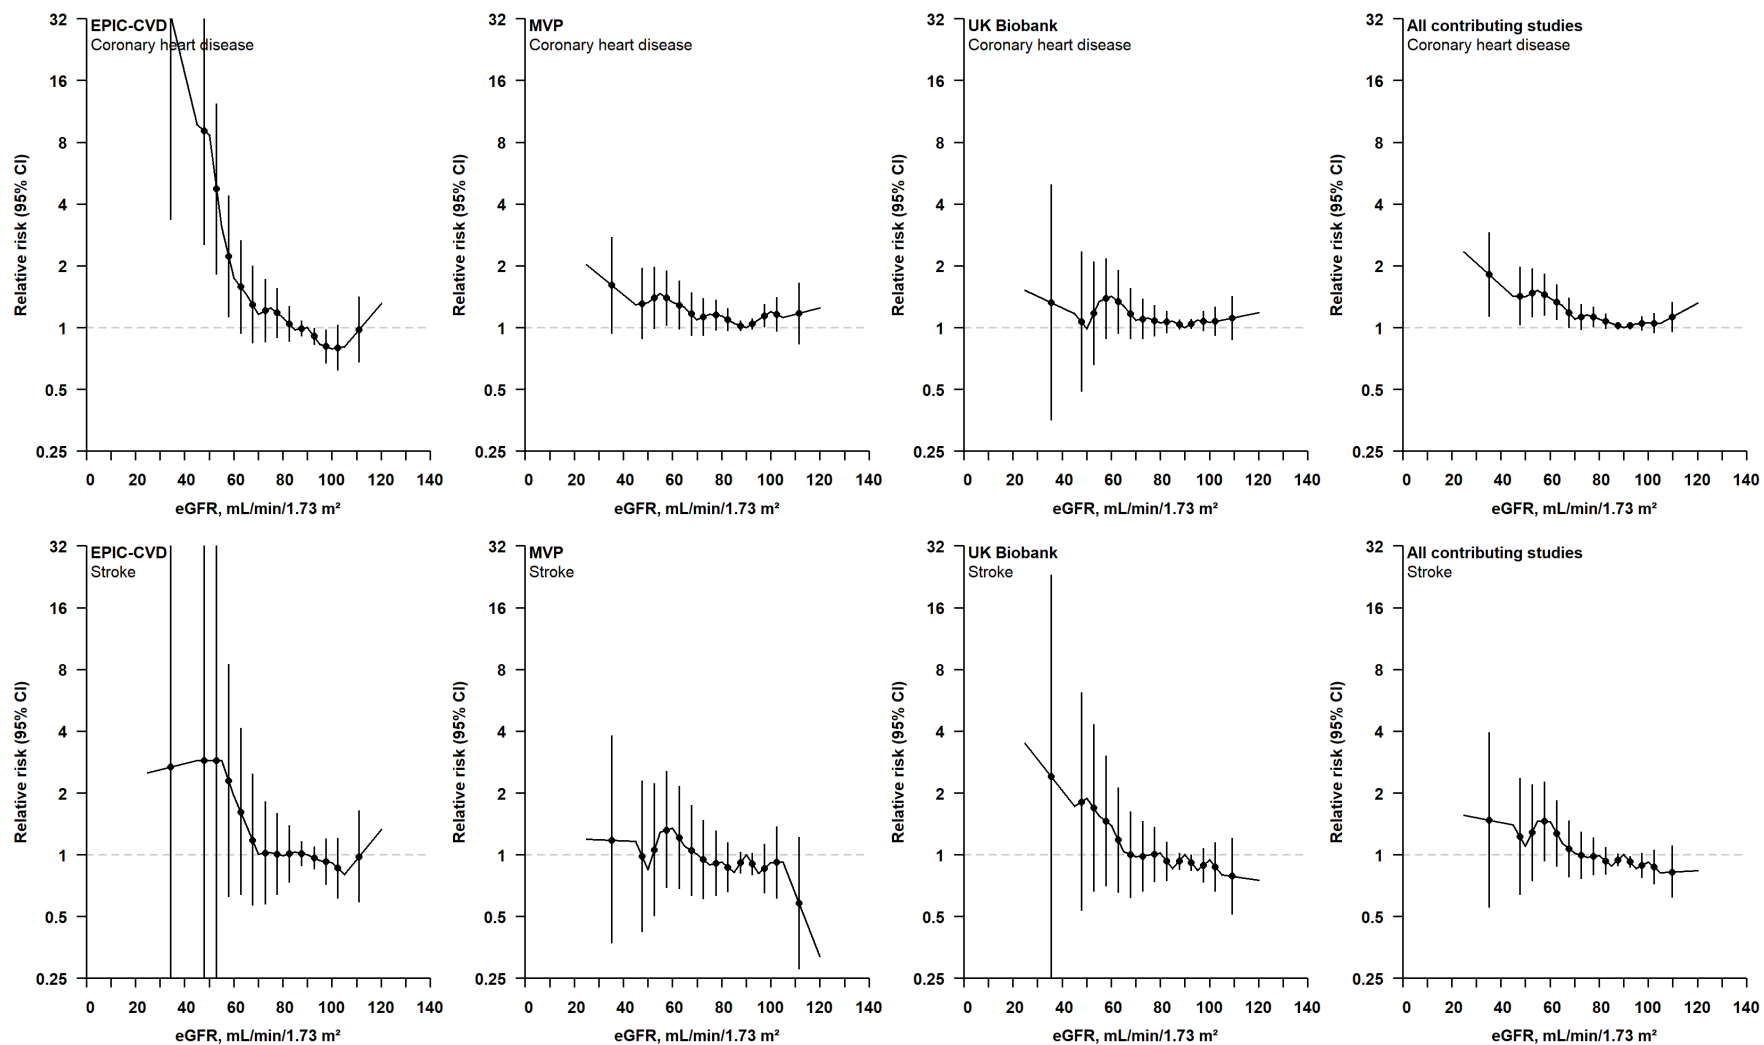

The reference point is 90 mL/min/1.73 m<sup>2</sup>. Gradients at each point of the curve represent the localized average causal effect on coronary heart disease or stroke per 5 mL/min/1.73 m<sup>2</sup> change in genetically-predicted eGFR. Vertical lines represent 95% confidence intervals.

**Figure S17: Mendelian randomization estimates of genetically-predicted eGFR with risk of coronary heart disease, stroke, and ischemic stroke (n=413,718)**

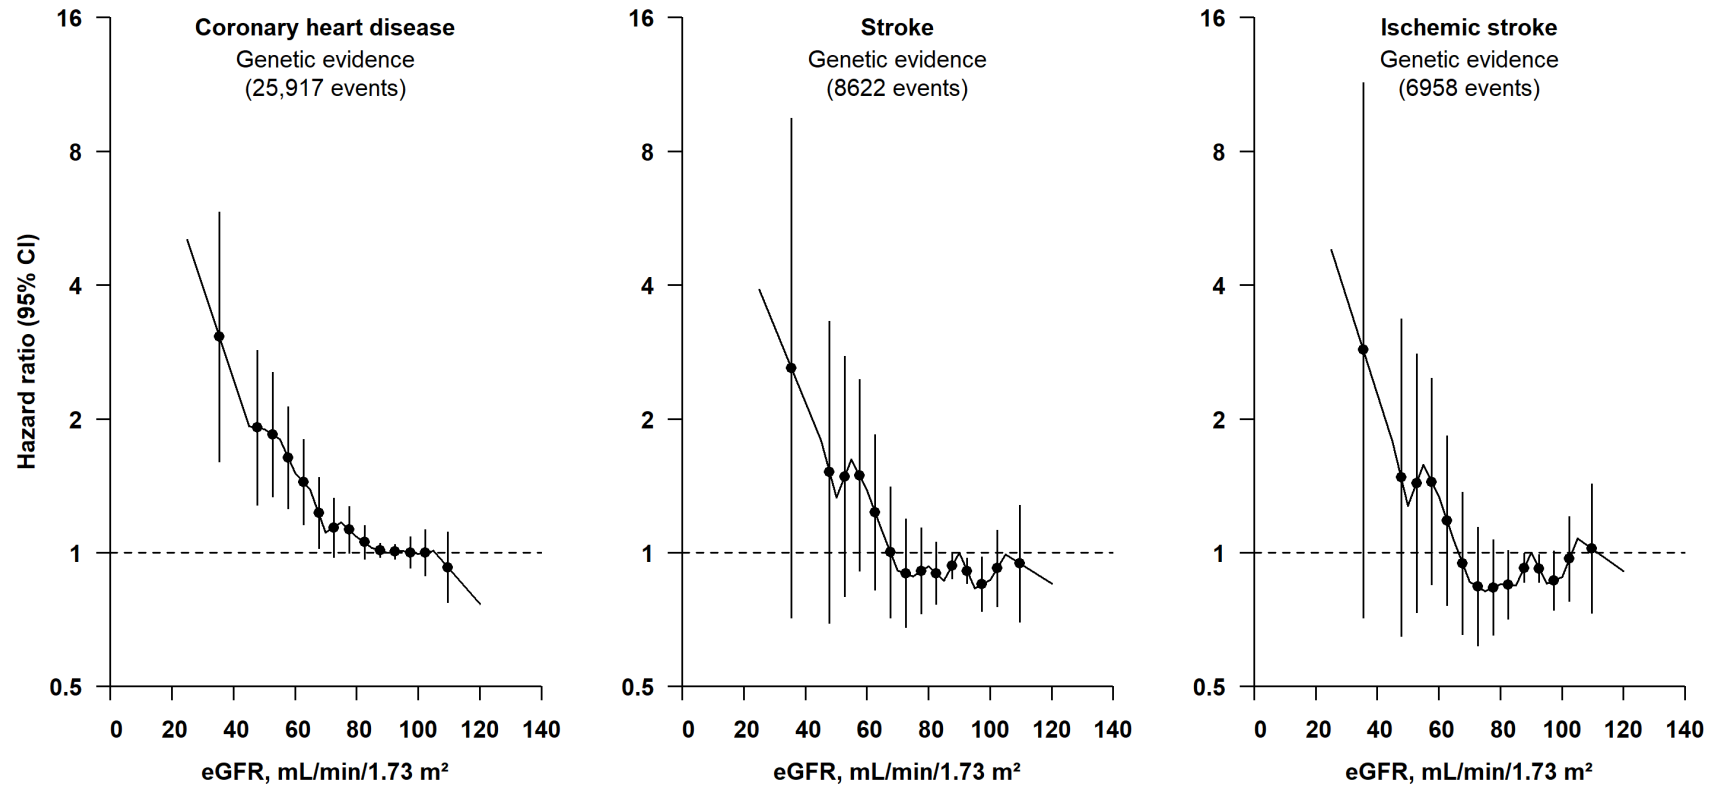

The reference point is 90 mL/min/1.73 m<sup>2</sup>. Gradients at each point of the curve represent the localized average causal effect on coronary heart disease or stroke per 5 mL/min/1.73 m<sup>2</sup> change in genetically-predicted eGFR. Vertical lines represent 95% confidence intervals.

**Figure S18: Mendelian randomization estimates of genetically-predicted eGFR with risk of coronary heart disease, stroke, and ischemic stroke, by different GRSs**

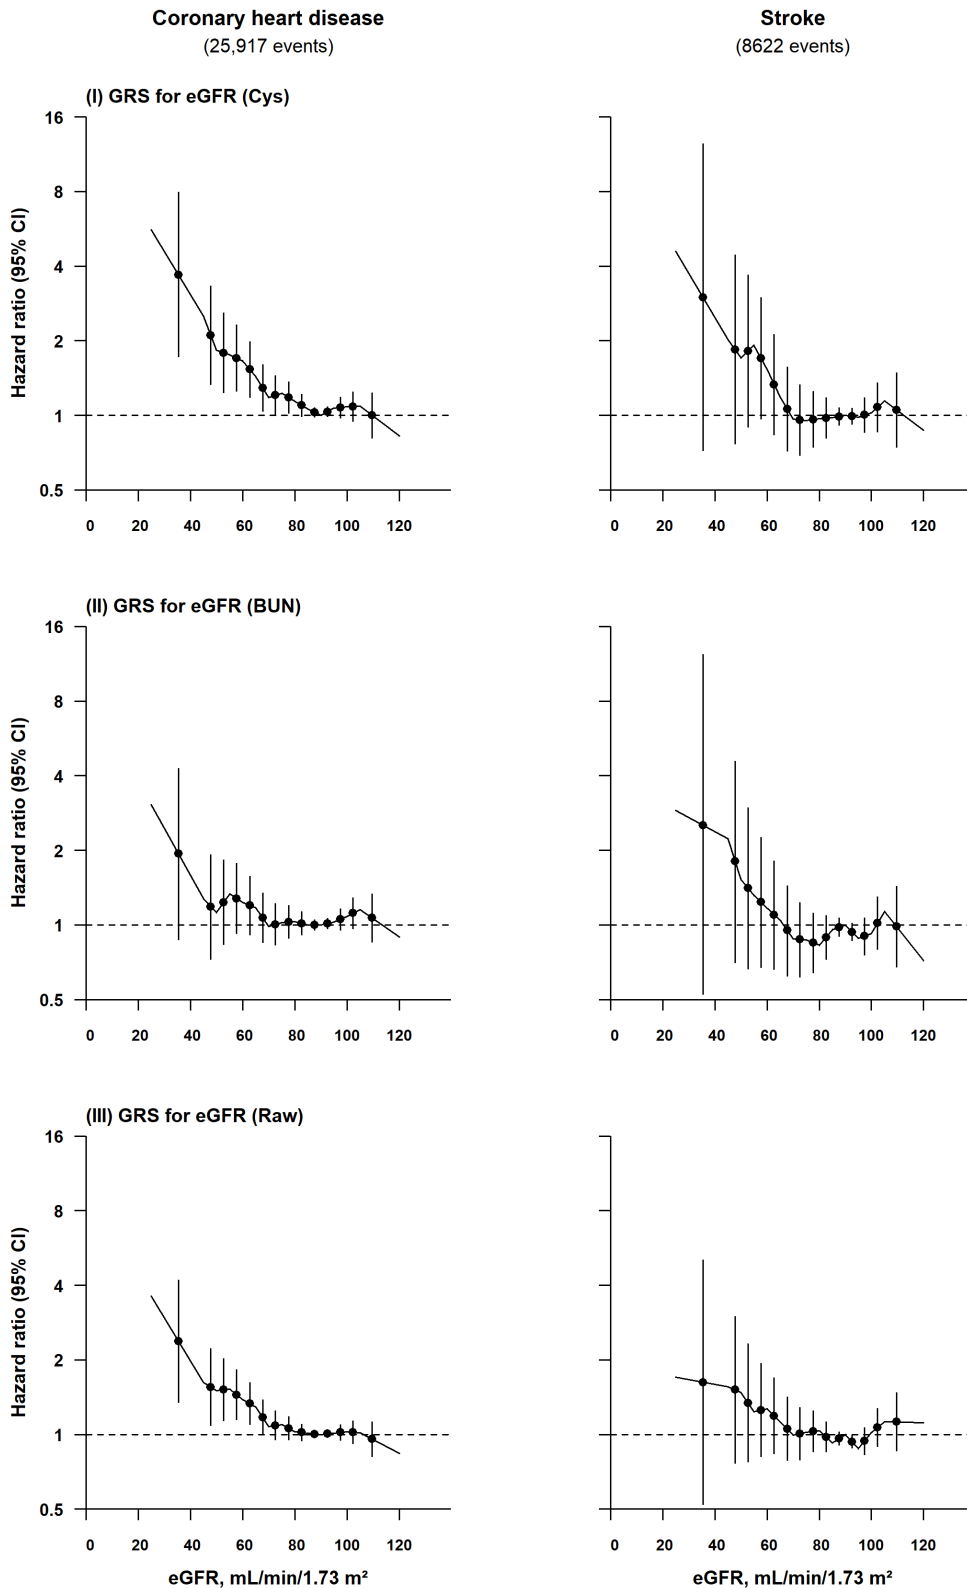

The reference point is 90 mL/min/1.73 m<sup>2</sup>. Gradients at each point of the curve represent the localized average causal effect on coronary heart disease or stroke per 5 mL/min/1.73 m<sup>2</sup> changes in genetically-predicted eGFR. Vertical lines represent 95% confidence intervals.

## **ACKNOWLEDGEMENTS**

### **VA Million Veteran Program Core Acknowledgement for Publications Updated December 2021**

#### **MVP Program Office**

- Program Director - Sumitra Muralidhar, Ph.D.  
US Department of Veterans Affairs, 810 Vermont Avenue NW, Washington, DC 20420
- Associate Director, Scientific Programs - Jennifer Moser, Ph.D.  
US Department of Veterans Affairs, 810 Vermont Avenue NW, Washington, DC 20420
- Associate Director, Cohort Management & Public Relations - Jennifer E. Deen, B.S.  
US Department of Veterans Affairs, 810 Vermont Avenue NW, Washington, DC 20420

#### **MVP Executive Committee**

- Co-Chair: J. Michael Gaziano, M.D., M.P.H.  
VA Boston Healthcare System, 150 S. Huntington Avenue, Boston, MA 02130
- Co-Chair: Sumitra Muralidhar, Ph.D.  
US Department of Veterans Affairs, 810 Vermont Avenue NW, Washington, DC 20420
- Jean Beckham, Ph.D.  
Durham VA Medical Center, 508 Fulton Street, Durham, NC 27705
- Kyong-Mi Chang, M.D.  
Philadelphia VA Medical Center, 3900 Woodland Avenue, Philadelphia, PA 19104
- Philip S. Tsao, Ph.D.  
VA Palo Alto Health Care System, 3801 Miranda Avenue, Palo Alto, CA 94304
- Shih-Wen Luoh, M.D., Ph.D.  
VA Portland Health Care System, 3710 SW US Veterans Hospital Rd, Portland, OR 97239  
US Department of Veterans Affairs, 810 Vermont Avenue NW, Washington, DC 20420
- Juan P. Casas, M.D., Ph.D., Ex-Officio  
VA Boston Healthcare System, 150 S. Huntington Avenue, Boston, MA 02130

#### **MVP Principal Investigators**

- J. Michael Gaziano, M.D., M.P.H.  
VA Boston Healthcare System, 150 S. Huntington Avenue, Boston, MA 02130
- Philip S. Tsao, Ph.D.  
VA Palo Alto Health Care System, 3801 Miranda Avenue, Palo Alto, CA 94304

#### **MVP Operations**

- MVP Executive Director – Juan P. Casas, M.D., Ph.D.  
VA Boston Healthcare System, 150 S. Huntington Avenue, Boston, MA 02130
- Director of Regulatory Affairs – Lori Churby, B.S.  
VA Palo Alto Health Care System, 3801 Miranda Avenue, Palo Alto, CA 94304
- MVP Cohort Management Director – Stacey B. Whitbourne, Ph.D.

- VA Boston Healthcare System, 150 S. Huntington Avenue, Boston, MA 02130
- MVP Recruitment/Enrollment Director - Jessica V. Brewer, M.P.H.
- VA Boston Healthcare System, 150 S. Huntington Avenue, Boston, MA 02130
- Director, VA Central Biorepository, Boston – Mary T. Brophy M.D., M.P.H.
- VA Boston Healthcare System, 150 S. Huntington Avenue, Boston, MA 02130
- Executive Director for MVP Biorepositories - Luis E. Selva, Ph.D.
- VA Boston Healthcare System, 150 S. Huntington Avenue, Boston, MA 02130
- MVP Informatics, Boston – Shahpoor (Alex) Shayan, M.S.
- VA Boston Healthcare System, 150 S. Huntington Avenue, Boston, MA 02130
- Director, MVP Data Operations/Analytics, Boston – Kelly Cho, M.P.H., Ph.D.
- VA Boston Healthcare System, 150 S. Huntington Avenue, Boston, MA 02130
- Director, Center for Computational and Data Science (C-DACS) & Genomics Core – Saiju Pyarajan Ph.D.
- VA Boston Healthcare System, 150 S. Huntington Avenue, Boston, MA 02130
- Director, Molecular Data Core – Philip S. Tsao, Ph.D.
- VA Palo Alto Health Care System, 3801 Miranda Avenue, Palo Alto, CA 94304
- Director, Phenomics Data Core – Kelly Cho, M.P.H, Ph.D.
- VA Boston Healthcare System, 150 S. Huntington Avenue, Boston, MA 02130
- Director, VA Informatics and Computing Infrastructure (VINCI) – Scott L. DuVall, Ph.D.
- VA Salt Lake City Health Care System, 500 Foothill Drive, Salt Lake City, UT 84148
- MVP Coordinating Centers
  - o Cooperative Studies Program Clinical Research Pharmacy Coordinating Center, Albuquerque – Todd Connor, Pharm.D.; Dean P. Argyres, B.S., M.S.  
New Mexico VA Health Care System, 1501 San Pedro Drive SE, Albuquerque, NM 87108
  - o Genomics Coordinating Center, Palo Alto – Philip S. Tsao, Ph.D.  
VA Palo Alto Health Care System, 3801 Miranda Avenue, Palo Alto, CA 94304
  - o MVP Boston Coordinating Center, Boston - J. Michael Gaziano, M.D., M.P.H.  
VA Boston Healthcare System, 150 S. Huntington Avenue, Boston, MA 02130
  - o MVP Information Center, Canandaigua – Brady Stephens, M.S.  
Canandaigua VA Medical Center, 400 Fort Hill Avenue, Canandaigua, NY 14424

### **Current MVP Local Site Investigators**

- Atlanta VA Medical Center (Peter Wilson, M.D.)  
1670 Clairmont Road, Decatur, GA 30033
- Bay Pines VA Healthcare System (Rachel McArdle, Ph.D.)  
10,000 Bay Pines Blvd Bay Pines, FL 33744
- Birmingham VA Medical Center (Louis Dellitalia, M.D.)  
700 S. 19th Street, Birmingham AL 35233
- Central Western Massachusetts Healthcare System (Kristin Mattocks, Ph.D., M.P.H.)  
421 North Main Street, Leeds, MA 01053
- Cincinnati VA Medical Center (John Harley, M.D., Ph.D.)

- 3200 Vine Street, Cincinnati, OH 45220
- Clement J. Zablocki VA Medical Center (Jeffrey Whittle, M.D., M.P.H.)  
5000 West National Avenue, Milwaukee, WI 53295
  - VA Northeast Ohio Healthcare System (Frank Jacono, M.D.)  
10701 East Boulevard, Cleveland, OH 44106
  - Durham VA Medical Center (Jean Beckham, Ph.D.)  
508 Fulton Street, Durham, NC 27705
  - Edith Nourse Rogers Memorial Veterans Hospital (John Wells., Ph.D.)  
200 Springs Road, Bedford, MA 01730
  - Edward Hines, Jr. VA Medical Center (Salvador Gutierrez, M.D.)  
5000 South 5th Avenue, Hines, IL 60141
  - Veterans Health Care System of the Ozarks (Kathrina Alexander, M.D.)  
1100 North College Avenue, Fayetteville, AR 72703
  - Fargo VA Health Care System (Kimberly Hammer, Ph.D.)  
2101 N. Elm, Fargo, ND 58102
  - VA Health Care Upstate New York (James Norton, Ph.D.)  
113 Holland Avenue, Albany, NY 12208
  - New Mexico VA Health Care System (Gerardo Villareal, M.D.)  
1501 San Pedro Drive, S.E. Albuquerque, NM 87108
  - VA Boston Healthcare System (Scott Kinlay, M.B.B.S., Ph.D.)  
150 S. Huntington Avenue, Boston, MA 02130
  - VA Western New York Healthcare System (Junzhe Xu, M.D.)  
3495 Bailey Avenue, Buffalo, NY 14215-1199
  - Ralph H. Johnson VA Medical Center (Mark Hamner, M.D.)  
109 Bee Street, Mental Health Research, Charleston, SC 29401
  - Columbia VA Health Care System (Roy Mathew, M.D.)  
6439 Garners Ferry Road, Columbia, SC 29209
  - VA North Texas Health Care System (Sujata Bhushan, M.D.)  
4500 S. Lancaster Road, Dallas, TX 75216
  - Hampton VA Medical Center (Pran Iruvanti, D.O., Ph.D.)  
100 Emancipation Drive, Hampton, VA 23667
  - Richmond VA Medical Center (Michael Godschalk, M.D.)  
1201 Broad Rock Blvd., Richmond, VA 23249
  - Iowa City VA Health Care System (Zuhair Ballas, M.D.)  
601 Highway 6 West, Iowa City, IA 52246-2208
  - Eastern Oklahoma VA Health Care System (River Smith, Ph.D.)  
1011 Honor Heights Drive, Muskogee, OK 74401
  - James A. Haley Veterans' Hospital (Stephen Mastorides, M.D.)  
13000 Bruce B. Downs Blvd, Tampa, FL 33612
  - James H. Quillen VA Medical Center (Jonathan Moorman, M.D., Ph.D.)  
Corner of Lamont & Veterans Way, Mountain Home, TN 37684
  - John D. Dingell VA Medical Center (Saib Gappy, M.D.)  
4646 John R Street, Detroit, MI 48201

- Louisville VA Medical Center (Jon Klein, M.D., Ph.D.)  
800 Zorn Avenue, Louisville, KY 40206
- Manchester VA Medical Center (Nora Ratcliffe, M.D.)  
718 Smyth Road, Manchester, NH 03104
- Miami VA Health Care System (Ana Palacio, M.D., M.P.H.)  
1201 NW 16th Street, 11 GRC, Miami FL 33125
- Michael E. DeBakey VA Medical Center (Olaoluwa Okusaga, M.D.)  
2002 Holcombe Blvd, Houston, TX 77030
- Minneapolis VA Health Care System (Maureen Murdoch, M.D., M.P.H.)  
One Veterans Drive, Minneapolis, MN 55417
- N. FL/S. GA Veterans Health System (Peruvemba Sriram, M.D.)  
1601 SW Archer Road, Gainesville, FL 32608
- Northport VA Medical Center (Shing Shing Yeh, Ph.D., M.D.)  
79 Middleville Road, Northport, NY 11768
- Overton Brooks VA Medical Center (Neeraj Tandon, M.D.)  
510 East Stoner Ave, Shreveport, LA 71101
- Philadelphia VA Medical Center (Darshana Jhala, M.D.)  
3900 Woodland Avenue, Philadelphia, PA 19104
- Phoenix VA Health Care System (Samuel Aguayo, M.D.)  
650 E. Indian School Road, Phoenix, AZ 85012
- Portland VA Medical Center (David Cohen, M.D.)  
3710 SW U.S. Veterans Hospital Road, Portland, OR 97239
- Providence VA Medical Center (Satish Sharma, M.D.)  
830 Chalkstone Avenue, Providence, RI 02908
- Richard Roudebush VA Medical Center (Suthat Liangpunsakul, M.D., M.P.H.)  
1481 West 10th Street, Indianapolis, IN 46202
- Salem VA Medical Center (Kris Ann Oursler, M.D.)  
1970 Roanoke Blvd, Salem, VA 24153
- San Francisco VA Health Care System (Mary Whooley, M.D.)  
4150 Clement Street, San Francisco, CA 94121
- South Texas Veterans Health Care System (Sunil Ahuja, M.D.)  
7400 Merton Minter Boulevard, San Antonio, TX 78229
- Southeast Louisiana Veterans Health Care System (Joseph Constans, Ph.D.)  
2400 Canal Street, New Orleans, LA 70119
- Southern Arizona VA Health Care System (Paul Meyer, M.D., Ph.D.)  
3601 S 6th Avenue, Tucson, AZ 85723
- Sioux Falls VA Health Care System (Jennifer Greco, M.D.)  
2501 W 22nd Street, Sioux Falls, SD 57105
- St. Louis VA Health Care System (Michael Rauchman, M.D.)  
915 North Grand Blvd, St. Louis, MO 63106
- Syracuse VA Medical Center (Richard Servatius, Ph.D.)  
800 Irving Avenue, Syracuse, NY 13210
- VA Eastern Kansas Health Care System (Melinda Gaddy, Ph.D.)



- 4101 S 4th Street Trafficway, Leavenworth, KS 66048
- VA Greater Los Angeles Health Care System (Agnes Wallbom, M.D., M.S.)  
11301 Wilshire Blvd, Los Angeles, CA 90073
  - VA Long Beach Healthcare System (Timothy Morgan, M.D.)  
5901 East 7th Street Long Beach, CA 90822
  - VA Maine Healthcare System (Todd Stapley, D.O.)  
1 VA Center, Augusta, ME 04330
  - VA New York Harbor Healthcare System (Peter Liang, M.D., M.P.H.)  
423 East 23rd Street, New York, NY 10010
  - VA Pacific Islands Health Care System (Daryl Fujii, Ph.D.)  
459 Patterson Rd, Honolulu, HI 96819
  - VA Palo Alto Health Care System (Philip Tsao, Ph.D.)  
3801 Miranda Avenue, Palo Alto, CA 94304-1290
  - VA Pittsburgh Health Care System (Patrick Strollo, Jr., M.D.)  
University Drive, Pittsburgh, PA 15240
  - VA Puget Sound Health Care System (Edward Boyko, M.D.)  
1660 S. Columbian Way, Seattle, WA 98108-1597
  - VA Salt Lake City Health Care System (Jessica Walsh, M.D.)  
500 Foothill Drive, Salt Lake City, UT 84148
  - VA San Diego Healthcare System (Samir Gupta, M.D., M.S.C.S.)  
3350 La Jolla Village Drive, San Diego, CA 92161
  - VA Sierra Nevada Health Care System (Mostaqul Huq, Pharm.D., Ph.D.)  
975 Kirman Avenue, Reno, NV 89502
  - VA Southern Nevada Healthcare System (Joseph Fayad, M.D.)  
6900 North Pecos Road, North Las Vegas, NV 89086
  - VA Tennessee Valley Healthcare System (Adriana Hung, M.D., M.P.H.)  
1310 24th Avenue, South Nashville, TN 37212
  - Washington DC VA Medical Center (Jack Lichy, M.D., Ph.D.)  
50 Irving St, Washington, D. C. 20422
  - W.G. (Bill) Hefner VA Medical Center (Robin Hurley, M.D.)  
1601 Brenner Ave, Salisbury, NC 28144
  - White River Junction VA Medical Center (Brooks Robey, M.D.)  
163 Veterans Drive, White River Junction, VT 05009
  - William S. Middleton Memorial Veterans Hospital (Prakash Balasubramanian, M.D.)  
2500 Overlook Terrace, Madison, WI 53705
